# Supplementary material for: The impact of chronic hepatitis B infection on major adverse cardiovascular events and all-cause mortality in patients with diabetes: a nationwide population-based study from Taiwan
Source: PubMed Central journal article supplement — BMJ Open. 2017 Aug 21;7(8):e016179. doi: 10.1136/bmjopen-2017-016179 (PMC5629723; doi:10.1136/bmjopen-2017-016179), 2017-08-21
Supplement: bmjopen-2017-016179.draft_revisions.pdf [file bmjopen-2017-016179.draft_revisions.pdf]

# BMJ Open

BMJ Open is committed to open peer review. As part of this commitment we make the peer review history of every article we publish publicly available.

When an article is published we post the peer reviewers' comments and the authors' responses online. We also post the versions of the paper that were used during peer review. These are the versions that the peer review comments apply to.

The versions of the paper that follow are the versions that were submitted during the peer review process. They are not the versions of record or the final published versions. They should not be cited or distributed as the published version of this manuscript.

BMJ Open is an open access journal and the full, final, typeset and author-corrected version of record of the manuscript is available on our site with no access controls, subscription charges or pay-per-view fees (<http://bmjopen.bmj.com>).

If you have any questions on BMJ Open's open peer review process please email [editorial.bmjopen@bmj.com](mailto:editorial.bmjopen@bmj.com)

# BMJ Open

## Chronic Hepatitis B Infection in Diabetic Patients: Friend or Foe? - A Nationwide Population-Based Nested Case-Control Study

|                                 |                                                                                                                                                                                                                                                                                                                                                                                                                                                                                                                                                                                                                                                                                                                                                                                                                                                                                                                                                                    |
|---------------------------------|--------------------------------------------------------------------------------------------------------------------------------------------------------------------------------------------------------------------------------------------------------------------------------------------------------------------------------------------------------------------------------------------------------------------------------------------------------------------------------------------------------------------------------------------------------------------------------------------------------------------------------------------------------------------------------------------------------------------------------------------------------------------------------------------------------------------------------------------------------------------------------------------------------------------------------------------------------------------|
| Journal:                        | <i>BMJ Open</i>                                                                                                                                                                                                                                                                                                                                                                                                                                                                                                                                                                                                                                                                                                                                                                                                                                                                                                                                                    |
| Manuscript ID                   | bmjopen-2017-016179                                                                                                                                                                                                                                                                                                                                                                                                                                                                                                                                                                                                                                                                                                                                                                                                                                                                                                                                                |
| Article Type:                   | Research                                                                                                                                                                                                                                                                                                                                                                                                                                                                                                                                                                                                                                                                                                                                                                                                                                                                                                                                                           |
| Date Submitted by the Author:   | 30-Jan-2017                                                                                                                                                                                                                                                                                                                                                                                                                                                                                                                                                                                                                                                                                                                                                                                                                                                                                                                                                        |
| Complete List of Authors:       | Kuo, Chin-Sung; Taipei Veterans General Hospital, Division of Endocrinology and Metabolism<br>Chen, Yung-Tai; Taipei City Hospital Heping Fuyou Branch, Department of Medicine<br>Hsu, Chien-Yi; Taipei Medical University Hospital, Division of Cardiology, Department of Medicine<br>Chang, Chun-Chin; Taipei Veterans General Hospital, Division of Cardiology, Department of Medicine<br>Chou, Ruey-Hsing; Taipei Veterans General Hospital, Division of Cardiology, Department of Medicine<br>Li, Szu-Yuan; Taipei Veterans General Hospital, Divisions of Nephrology<br>Kuo, Shu-Chen; National Health Research Institutes, National Institute of Infectious Diseases and Vaccinology<br>Huang, Po-Hsun; Division of Cardiology, Department of Medicine, Taipei Veterans General Hospital, ;<br>Chen, Jaw-Wen; Taipei Veterans General Hospital, Department of Medical Research<br>Lin, Shing-Jong; Taipei Veterans general Hospital, Division of Cardiology |
| <b>Primary Subject Heading</b>: | Epidemiology                                                                                                                                                                                                                                                                                                                                                                                                                                                                                                                                                                                                                                                                                                                                                                                                                                                                                                                                                       |
| Secondary Subject Heading:      | Cardiovascular medicine, Diabetes and endocrinology, Gastroenterology and hepatology                                                                                                                                                                                                                                                                                                                                                                                                                                                                                                                                                                                                                                                                                                                                                                                                                                                                               |
| Keywords:                       | Myocardial infarction < CARDIOLOGY, Stroke < NEUROLOGY, Diabetes & endocrinology < INTERNAL MEDICINE, Hepatology < INTERNAL MEDICINE                                                                                                                                                                                                                                                                                                                                                                                                                                                                                                                                                                                                                                                                                                                                                                                                                               |
|                                 |                                                                                                                                                                                                                                                                                                                                                                                                                                                                                                                                                                                                                                                                                                                                                                                                                                                                                                                                                                    |

SCHOLARONE™  
Manuscripts

1  
2  
3  
4 **Chronic Hepatitis B Infection in Diabetic Patients: Friend or Foe? - A Nationwide**  
5  
6 **Population-Based Nested Case-Control Study**  
7  
8  
9

10  
11  
12 Chin-Sung Kuo M.D.<sup>1,9†</sup>; Yung-Tai Chen M.D.<sup>6,9†</sup>; Chien-Yi Hsu M.D.<sup>7,9,12,14</sup>; Chun-Chin  
13  
14 Chang M.D.<sup>2,9</sup>; Ruey-Hsing Chou M.D.<sup>2,9</sup>; Szu-Yuan Li M.D.<sup>3,9</sup>; Shu-Chen Kuo M.D.<sup>4,11</sup>;  
15  
16 \*Po-Hsun Huang M.D. Ph.D.<sup>2,7,9</sup>; Jaw-Wen Chen M.D.<sup>2,5,7,8</sup>; \*Shing-Jong Lin M.D.  
17  
18  
19  
20  
21 Ph.D.<sup>2,5,7,9,13</sup>  
22  
23  
24  
25  
26

27 <sup>1</sup>Division of Endocrinology and Metabolism; <sup>2</sup>Division of Cardiology; <sup>3</sup>Division of  
28  
29 Nephrology; <sup>4</sup>Division of Infectious Diseases, Department of Medicine; <sup>5</sup>Department of  
30  
31 Medical Research, Taipei Veterans General Hospital, Taipei, Taiwan; <sup>6</sup>Department of  
32  
33 Medicine, Taipei City Hospital Heping Fuyou Branch, Taipei, Taiwan; <sup>7</sup>Cardiovascular  
34  
35 Research Center; <sup>8</sup>Institute of Pharmacology; <sup>9</sup>Institute of Clinical Medicine, National  
36  
37 Yang-Ming University, Taipei, Taiwan; <sup>10</sup>Department of Medicine, Yuli branch, Taipei  
38  
39 Veterans General Hospital, Hualien, Taiwan; <sup>11</sup>National Institute of Infectious Diseases  
40  
41 and Vaccinology, National Health Research Institutes, Miaoli County, Taiwan;  
42  
43  
44  
45  
46  
47  
48  
49  
50 <sup>12</sup>Department of Internal Medicine, School of Medicine, <sup>13</sup>Taipei Medical University,  
51  
52 Taipei, Taiwan; <sup>14</sup>Division of Cardiology and Cardiovascular Research Center,  
53  
54 Department of Internal Medicine, Taipei Medical University Hospital, Taipei, Taiwan.  
55  
56  
57  
58  
59  
60

1  
2  
3  
4  
5  
6  
7  
8  
9  
10 **Running title:** Chronic Hepatitis B Infection in Diabetic Patients  
11  
12  
13  
14  
15  
16  
17

18 ‡These authors contributed equally and share the first authorship  
19  
20  
21  
22  
23

24 \*Address correspondence to:  
25  
26

27 Dr. Po-Hsun Huang and Dr. Shing-Jong Lin  
28

29 Division of Cardiology, Department of Medicine,  
30  
31

32 Taipei Veterans General Hospital  
33  
34

35 No. 201, Sec. 2, Shih-Pai Road, Taipei, Taiwan (R.O.C.)  
36  
37

38 Tel: 886-2-2871-2121 ext. 7511  
39  
40

41 Fax: 886-2-2875-7735.  
42  
43

44 **E-mail:** [huangbsvgh@gmail.com](mailto:huangbsvgh@gmail.com) and [sjlin@vghtpe.gov.tw](mailto:sjlin@vghtpe.gov.tw)  
45  
46  
47  
48  
49

50 Electronic word counts: 2783  
51  
52

53 Table number: 2  
54  
55

56 Figure number: 3  
57  
58  
59  
60

1  
2  
3  
4  
5  
6  
7  
8  
9  
10  
11  
12  
13  
14  
15  
16  
17  
18  
19  
20  
21  
22  
23  
24  
25  
26  
27  
28  
29  
30  
31  
32  
33  
34  
35  
36  
37  
38  
39  
40  
41  
42  
43  
44  
45  
46  
47  
48  
49  
50  
51  
52  
53  
54  
55  
56  
57  
58  
59  
60

Supplementary table number: 3

For peer review only

## ABSTRACT

**Objects:** The association between hepatitis B virus (HBV) infection and cardiovascular disease remains uncertain. No previous study has explored long-term hard endpoints (i.e., myocardial infarction, ischemic stroke) and all-cause mortality in diabetic patients with chronic HBV infection.

**Design:** We conducted a nationwide longitudinal cohort study using Taiwan's National Health Insurance Research Database to identify propensity score-matched diabetic patients with and without HBV infection during 2000–2012. Chronic HBV infection was identified based on  $\geq 3$  outpatient clinic visits or one hospital admission with a diagnosis of HBV infection. Primary outcomes were major adverse cardiovascular events (MACE, including myocardial infarction and ischemic stroke), heart failure, and all-cause mortality.

**Participants:** The study included 40,162 diabetic patients with chronic HBV infection (HBV cohort) and 40,162 propensity score-matched diabetic patients without HBV infection (control cohort).

**Results:** During the median follow-up period of  $5.3 \pm 3.4$  years, the HBV cohort had significantly lower risks of myocardial infarction (adjusted hazard ratio [aHR] = 0.49; 95% confidence interval [CI], 0.42–0.56), ischemic stroke (aHR = 0.61; 95% CI, 0.56–0.67), heart failure (aHR = 0.50; 95% CI, 0.43–0.59), and all-cause mortality (aHR =

1  
2  
3  
4 0.72; 95% CI, 0.70–0.75) compared with the control cohort. The impact of HBV infection  
5  
6  
7 on the sequential risk of MACE was greater in patients with fewer diabetic  
8  
9 complications.  
10

11  
12 **Conclusions:** Chronic HBV infection was associated with decreased risk of MACE and  
13  
14 heart failure in diabetic patients. Further research is necessary to investigate the  
15  
16 underlying mechanism of these findings.  
17  
18  
19

20  
21 **Key Words:** atherosclerosis, diabetes, hepatitis B virus, ischemic stroke, myocardial  
22  
23 infarction  
24  
25  
26  
27  
28  
29  
30  
31  
32  
33  
34  
35  
36  
37  
38  
39  
40  
41  
42  
43  
44  
45  
46  
47  
48  
49  
50  
51  
52  
53  
54  
55  
56  
57  
58  
59  
60

### Strengths and limitations of this study

- An unselected nationwide population with the most extensive sample of diabetic patients with chronic HBV infection available, minimizing the possibility of referral bias
- This study is the largest-scale, diabetic HBV cohort study to date.
- No previous study has explored long-term hard endpoints (i.e., myocardial infarction, ischemic stroke) and all-cause mortality in diabetic patients with chronic HBV infection.
- Values of liver function tests and glycated hemoglobin were not available in the nationwide dataset.
- Some personal information, including body mass index and smoking status, was not available in the administrative dataset



## INTRODUCTION

The global incidence of diabetes mellitus is increasing, and the number of diabetic patients is expected to reach 366 million by 2030 (1). Atherosclerotic cardiovascular disease is the leading cause of morbidity and mortality among individuals with diabetes, and the largest contributor to the direct and indirect economic costs of diabetes (2). Diabetes and commonly coexisting conditions (e.g., hypertension and dyslipidemia) are well-known risk factors for cardiovascular complications (3). Diabetes is also the leading cause of chronic kidney disease (CKD) and end-stage renal disease (4). Convincing evidence has shown that an interrelationship between chronic inflammation and metabolic abnormalities in diabetes leads to endothelial dysfunction and vascular complications (5).

Hepatitis B virus (HBV) infection has a high prevalence and is a major public health problem in Taiwan and other countries worldwide (6,7). Chronic HBV infection may cause chronic hepatitis, cirrhosis, hepatic decompensation, or hepatocellular carcinoma (HCC) (8). Chronic HBV infection is an inflammation condition. Other disease with chronic low grade inflammation have been shown to increase the risk of major cardiovascular events (MACE) (9). Nevertheless, chronic HBV infection has been reported to be inversely associated with metabolic syndrome in an analysis using the Third National Health and Nutrition Examination Survey (NHANES III) in the US (10) as

1  
2  
3  
4 well as in a population-base study in Taiwan (11). The association between HBV  
5  
6 infection and MACE, however, remains uncertain. Previous cross-sectional studies of  
7  
8 this association have produced conflicting results (12–14). One Korean cohort study  
9  
10 postulated that hepatitis B surface antigen (HBsAg) seropositivity was associated with  
11  
12 decreased risks of ischemic stroke and myocardial infarction, as well as an increased  
13  
14 risk of hemorrhagic stroke (15). A population-based prospective study conducted in  
15  
16 Taiwan showed that HBsAg seropositivity was not associated with enhanced  
17  
18 cardiovascular mortality during a 17-year follow-up period (16). There is no study to  
19  
20 date has examined the relationship between chronic HBV infection and MACE or  
21  
22 all-cause mortality in diabetic patients.  
23  
24  
25  
26  
27  
28  
29  
30  
31

32  
33 Accordingly, we conducted a nationwide longitudinal cohort study to investigate the  
34  
35 relationship between chronic HBV infection and MACE, as well as all-cause mortality, in  
36  
37 diabetic patients in Taiwan, which is one of the most hyperendemic areas for HBV  
38  
39 infection in the world (17). To our knowledge, this study is the largest diabetic HBV  
40  
41 cohort study.  
42  
43  
44  
45  
46  
47

## 48 **METHODS**

### 49 **Data Sources**

50  
51  
52 Data were extracted from the Taiwan National Health Insurance Research Database  
53  
54  
55  
56  
57  
58  
59  
60

1  
2  
3  
4 (NHIRD), which contains anonymized secondary data that are available for research  
5  
6  
7 purposes. Taiwan's National Health Insurance (NHI) program, launched in 1995,  
8  
9  
10 currently covers 99% of the population of 23 million people. The database comprises all  
11  
12  
13 registry and claims data from the NHI system, ranging from demographic data to  
14  
15  
16 detailed orders for ambulatory and inpatient care. Taiwan's NHI Bureau is responsible  
17  
18  
19 for auditing medical payments through a comprehensive review of medical records,  
20  
21  
22 examination reports, and results of imaging studies. If a physician fails to meet the  
23  
24  
25 standards for clinical practice, Taiwan's NHI reserves the right to reject payment and  
26  
27  
28 may impose substantial financial penalties. Disease diagnoses are coded according to  
29  
30  
31 the International Classification of Disease, Ninth Revision, Clinical Modification  
32  
33  
34 (ICD-9-CM). The diagnostic accuracy for major diseases of codes registered in the  
35  
36  
37 NHIRD has been validated thoroughly (18-21). In the present study, we used the  
38  
39  
40 Longitudinal Cohort of Diabetes Patients dataset, sourced directly from the NHIRD. This  
41  
42  
43 dataset includes all available medical registry data from a random sample of 120,000  
44  
45  
46 patients with diagnoses of diabetes mellitus each year since 1999. The study was  
47  
48  
49 exempt from full review by the Institutional Review Board of Taipei City Hospital  
50  
51  
52 (TCHIRB-1030603-W), because the dataset comprised de-identified secondary data.  
53  
54  
55

## 56 **Study Design**

57  
58  
59  
60

1  
2  
3  
4 This nationwide, population-based, observational, retrospective cohort study was  
5  
6  
7 conducted to determine the association between chronic HBV infection and sequential  
8  
9  
10 MACE in diabetic patients. Two cohorts were enrolled in the study: the HBV cohort and  
11  
12  
13 a matched control cohort. The HBV cohort consisted of patients diagnosed with chronic  
14  
15  
16 HBV infection, defined based on three or more outpatient clinic visits with ICD-9 codes  
17  
18  
19 070.2, 070.3, and/or V02.61, or admission with a diagnosis of chronic HBV infection  
20  
21  
22 between 1 January 2000 and 31 December 2012 (22). The index date was defined as  
23  
24  
25 the first day of chronic HBV infection diagnosis. Patients with the following  
26  
27  
28 characteristics were excluded: age < 20 years, diagnosis with hepatitis C infection,  
29  
30  
31 fewer than three outpatient clinic visits for HBV infection, history of myocardial infarction,  
32  
33  
34 and history of cerebrovascular disease. The control cohort comprised all patients with  
35  
36  
37 no diagnosis of HBV infection in the Longitudinal Cohort of Diabetes Patients dataset.  
38  
39  
40 The exclusion criteria for the HBV cohort were also applied to the control cohort. Index  
41  
42  
43 dates for subjects in the control cohort were assigned randomly and corresponded to  
44  
45  
46 those of patients in the HBV cohort.

47  
48 We used 1:1 propensity score matching and calculated propensity scores for the  
49  
50  
51 likelihood of diagnosis of chronic HBV infection using baseline covariates and  
52  
53  
54 multivariate logistic regression analysis (Supplemental Table A1). We matched one  
55  
56  
57 control patient with each patient in the HBV cohort with a similar propensity score based  
58  
59  
60

1  
2  
3  
4 on nearest-neighbor matching without replacement, using calipers of a width equal to  
5  
6  
7 0.1 standard deviation of the logit of the propensity score.  
8  
9

### 10 11 12 **Primary Outcome Measurement** 13

14  
15 The primary outcomes were hospitalization for myocardial infarction (ICD-9-CM code  
16  
17 410.x), ischemic stroke (ICD-9-CM codes 433.x, 434.x), or heart failure (ICD-9-CM code  
18  
19 428.x); and all-cause mortality. The MACE outcome was defined as a composite of  
20  
21 myocardial infarction and ischemic stroke. Previous studies have validate the accuracy  
22  
23 of myocardial infarction and ischemic stroke diagnoses in the NHIRD (21,23). We also  
24  
25 chose the occurrence of HCC as a positive control outcome and hospitalization for  
26  
27 appendicitis as a negative control outcome. To identify patients diagnosed with HCC,  
28  
29 we used data from Taiwan's Catastrophic Illness Registry, which requires  
30  
31 pathohistological confirmation of cancer diagnoses. Both cohorts were followed until  
32  
33 death or the end of the study period (31 December 2013).  
34  
35  
36  
37  
38  
39  
40  
41  
42  
43  
44  
45  
46  
47

### 48 **Baseline Characteristics** 49

50 Data on baseline demographic characteristics, including age, sex, monthly income (in  
51  
52 New Taiwan Dollars [NT\$]: <NT\$19,100, NT\$19,100–\$41,999, and ≥NT\$42,000), level  
53  
54 of urbanization, and Charlson Comorbidity Index score, were collected. Taiwan's  
55  
56  
57  
58  
59  
60

1  
2  
3  
4 National Health Research Institute has defined four urbanization levels for Taiwan. The  
5  
6  
7 most urbanized areas are designated as level 1, and the least urbanized areas are  
8  
9  
10 designated as level 4. The Charlson Comorbidity Index score reflects overall systemic  
11  
12 health, with each increase in number reflecting a stepwise increase in cumulative  
13  
14 mortality (24). We also identified use of medications that could confound the relationship  
15  
16  
17 between chronic HBV infection and the primary outcomes.  
18  
19

### 20 21 22 23 24 **Statistical Analysis**

25  
26  
27 Descriptive statistics were used to characterize the baseline data from the study cohorts.  
28  
29  
30 Baseline characteristics of the two groups were compared using standardized mean  
31  
32 differences. Propensity scores of the likelihood of diagnosis of chronic HBV infection  
33  
34 were determined by multivariate logistic regression analysis, conditional on baseline  
35  
36 covariates (Supplemental Table A1). The incidence rates of outcomes of interest in the  
37  
38 two groups were calculated using Poisson distributions. The cumulative incidence or  
39  
40 risk of outcomes was estimated using the Kaplan–Meier method, and differences  
41  
42 between cohorts were evaluated with the log-rank test. Cox regression models with a  
43  
44 conditional approach and stratification were used to calculate hazard ratios (HRs) and  
45  
46 95% confidence intervals (CIs) for the risks of outcomes (25). Cox regression with  
47  
48 adjustment for significant differences in covariates between groups was used to  
49  
50  
51  
52  
53  
54  
55  
56  
57  
58  
59  
60

1  
2  
3  
4 calculate adjusted HRs. Due to the high mortality rate of diabetic patients,  
5  
6  
7 competing-risk regression using Fine and Gray's model (26) was also performed.  
8  
9  
10 Finally, the likelihood ratio test was used to examine interactions between the  
11  
12 occurrence of outcomes subsequent to chronic HBV infection and the following  
13  
14 variables: age, sex, hypertension, coronary artery disease, CKD, dyslipidemia, use of  
15  
16 insulin, and adapted Diabetes Complications Severity Index score. Subgroup analyses  
17  
18 were also performed accordingly.  
19  
20  
21  
22  
23

24 SQL Server 2012 (Microsoft Corporation, Redmond, WA, USA) was used for data  
25  
26 linkage, processing, and sampling. Propensity scores were calculated with SAS version  
27  
28 9.3 (SAS Institute, Cary, NC, USA). All other statistical analyses were conducted using  
29  
30 STATA statistical software (version 12.0; StataCorp, College Station, TX, USA). *P*  
31  
32 values < 0.05 were considered to be statistically significant.  
33  
34  
35  
36  
37  
38  
39  
40

## 41 RESULTS

### 42 Patient Characteristics

43  
44  
45 The study cohort consisted of 40,162 diabetic patients with chronic HBV infection and  
46  
47 40,162 matched control subjects without HBV infection (Figure 1). The mean age was  
48  
49 52.7 (standard deviations, 11.6 [HBV] and 11.5 [control]) years, and 62.7% of subjects  
50  
51 were male (Table 1). The prevalence of comorbidities, such as cardiovascular risk  
52  
53  
54  
55  
56  
57  
58  
59  
60

factors, and concomitant medication use was similar in the HBV and control groups.

### **HBV Infection, Risk of Cardiovascular Disease, and All-Cause Mortality in Diabetic Patients**

During the mean 5.3-year follow-up period, the incidence rates of all-cause mortality, myocardial infarction, ischemic stroke, and heart failure were 26.96, 1.38, 3.71, and 1.12 per 10<sup>3</sup> person-years, respectively, in the HBV cohort and 35.29, 2.76, 5.88, and 2.01 per 10<sup>3</sup> person-years, respectively, in the matched control cohort (Table 2).

Compared with the matched control cohort, the HBV cohort had significantly reduced risks of all-cause mortality (adjusted HR = 0.72; 95% CI, 0.70–0.75;  $p < 0.001$ ), myocardial infarction (aHR = 0.49; 95% CI, 0.42–0.56;  $p < 0.001$ ), ischemic stroke (aHR = 0.61; 95% CI, 0.56–0.67;  $p < 0.001$ ), MACE (aHR = 0.58; 95% CI, 0.53–0.62;  $p < 0.001$ ), and heart failure (aHR = 0.50; 95% CI, 0.43–0.59;  $p < 0.001$ ; Table 2). The cumulative incidence of all-cause mortality and MACE in both groups was illustrated in Figure 2. The HBV cohort had a significantly higher risk of HCC (aHR = 7.47; 95% CI, 6.53–8.56;  $p < 0.001$ ) and a similar risk of hospitalization for appendicitis (aHR = 1.13; 95% CI, 0.93–1.38;  $p = 0.227$ ). Competing risk analysis yielded consistent results (Table 2).

An interaction test for all-cause mortality showed significant correlations between



1  
2  
3  
4 HBV infection and sex ( $p = 0.030$ ), hypertension ( $p < 0.001$ ), dyslipidemia ( $p < 0.001$ ),  
5  
6  
7 use of insulin ( $p = 0.020$ ), and adapted Diabetes Complications Severity Index score ( $p$   
8  
9  
10 = 0.010; Supplemental Table A2). An interaction test for MACE showed significant  
11  
12 correlations between HBV infection and sex ( $p = 0.002$ ), hypertension ( $p = 0.005$ ),  
13  
14 coronary artery disease ( $p = 0.005$ ), dyslipidemia ( $p = 0.003$ ), use of insulin ( $p = 0.005$ ),  
15  
16  
17 and adapted Diabetes Complications Severity Index score ( $p = 0.04$ ; Supplemental  
18  
19  
20 Table A3). In Figure 3, we conducted multivariable stratified subgroup analyses. The  
21  
22 effects of chronic HBV infection on all-cause mortality and MACE were greater in  
23  
24 patients without hypertension and dyslipidemia compared with matched controls. The  
25  
26  
27 association between chronic HBV infection and all-cause mortality or sequential MACE  
28  
29  
30 was also greater in patients who were not using insulin. In stratified analyses, the effect  
31  
32  
33 of chronic HBV infection on the sequential risk of MACE was greater in patients with low  
34  
35  
36 adapted Diabetes Complications Severity Index scores ( $<2$ ; Supplemental Tables 2 and  
37  
38  
39  
40  
41  
42  
43  
44  
45  
46  
47  
48  
49  
50  
51  
52  
53  
54  
55  
56  
57  
58  
59  
60  
3).

## CONCLUSIONS

To our knowledge, this propensity score–matched, nationwide, population-based study is the first to elucidate the correlation of chronic HBV infection with lower risks of MACE

1  
2  
3  
4 and heart failure in diabetic patients. In addition, we found a significantly decreased risk  
5  
6  
7 of all-cause mortality in diabetic patients with chronic HBV infection during the mean  
8  
9  
10 5.3-year follow-up period. The impact of HBV infection on the sequential risk of MACE  
11  
12  
13 was greater in patients with fewer diabetic complications.

14  
15 HBV X protein (HBx), 1 of 4 open reading frames in the HBV genome, has been  
16  
17  
18 reported involving in regulating apoptosis, inflammation, and tumorigenesis (27,28). In  
19  
20  
21 addition, HBx also has been shown to cause hepatic steatosis through the  
22  
23  
24 transcriptional activation of sterol regulatory element-binding protein 1 (SREBP1) and  
25  
26  
27 peroxisome proliferator-activated receptor (PPAR $\gamma$ ) transcripts (29), implying the  
28  
29  
30 involvement of HBV infection in regulation of lipid and glucose metabolism-related  
31  
32  
33 genes (10,29). Inverse association observed between metabolic syndrome and chronic  
34  
35  
36 HBV in the cross-sectional studies from NHANES III (10) and from Taiwan (11),  
37  
38  
39 supporting our findings. A recent systemic review article concluded that multiple, but not  
40  
41  
42 all, studies showed that patients with chronic HBV infection have lower risk of metabolic  
43  
44  
45 syndrome, non-alcoholic fatty liver disease and dyslipidemia (30). Their conclusions  
46  
47  
48 may provide part of the mechanism underlying the link between chronic HBV infection  
49  
50  
51 and MACE. A study of a non-diabetic Korean cohort showed that HBsAg seropositivity  
52  
53  
54 was associated with decreased risks of ischemic stroke and myocardial infarction (15).  
55  
56  
57 The Korean study found this association appeared to be secondary to HBV-associated  
58  
59  
60

1  
2  
3  
4 liver dysfunction (15). Other reported potential mechanisms linking chronic HBV  
5  
6  
7 infection to decreased risk of MACE include lower levels of clotting factors II and VII and  
8  
9  
10 fibrinogen among HBsAg-positive (vs. –negative) individuals, as found in blood donors  
11  
12  
13 in Gambia and London (31).

14  
15 A cohort study from England and Wales showed no significantly increased risk of  
16  
17  
18 all-cause mortality in transfusion donors with HBV infection (32). The standardized  
19  
20  
21 mortality rate (SMR) for circulatory disease was significantly low in both males and  
22  
23  
24 females (32). Their results may support or not against our findings. Furthermore, we  
25  
26  
27 found that the risk of circulatory disease deaths in HBV cohort was significantly low in  
28  
29  
30 the Australian study (33), was comparable in the Taiwan study (16) and was  
31  
32  
33 significantly high in the study from China (34). The China study conducted in 1992-2002  
34  
35  
36 with a very low cardiovascular mortality (20.6 in male, 16.4 in female per 100000  
37  
38  
39 person-year) in their HBV cohort (34). The study in Taiwan showed that HBsAg  
40  
41  
42 seropositivity was not associated with atherosclerosis-related mortality risk in a general  
43  
44  
45 population (16). One possible explanation for this result is the lack of statistical power  
46  
47  
48 (HR = 0.84; 95% CI, 0.72–1.06) because of the examination of a relatively small sample  
49  
50  
51 (480 cases of death from atherosclerotic disease) (16). Both the Australian and British  
52  
53  
54 studies are in agreement with our findings about relationship between HBV and MACE  
55  
56  
57 (32,33).

1  
2  
3  
4 Moreover, previous cohort studies reported an increased risk of all-cause mortality  
5  
6 attributed mostly to excess liver-related deaths in a general population (16,33,34). A  
7  
8 study from Australia reported that the risk of death was increased 1.4 times in subjects  
9  
10 with HBV infection (33); another study from Taiwan reported a 1.7 times elevated risk  
11  
12 (16) and a cohort study from China reported a three-fold increased risk (34). We are not  
13  
14 aware of any study that has examined the relationship between all-cause mortality and  
15  
16 chronic HBV infection in diabetic patients. We conducted this HBV study in population  
17  
18 with very high risk for MACE. In our diabetic cohort, the incidence rate of MACE was  
19  
20 high (498 vs. 839 per 100000 person-year) to provide sufficient endpoints (1098 vs.  
21  
22 1663 events). Our study demonstrated a reduced all-cause mortality risk in diabetic  
23  
24 subjects with chronic HBV infection. This finding may be explained by the decreased  
25  
26 MACE risk in our diabetic HBV cohort. Diabetes, which is considered to be a coronary  
27  
28 artery disease equivalent, is an important risk factor for cardiovascular disease (35).  
29  
30 Cardiovascular complication is the leading cause of mortality in diabetic patients (3). It is  
31  
32 plausible to hypothesize that the impact of HBV infection on all-cause mortality would be  
33  
34 greater in diabetic patients than in a general population.  
35  
36  
37  
38  
39  
40  
41  
42  
43  
44  
45  
46  
47  
48

49  
50 This study has several strengths. First, it involved an unselected nationwide  
51  
52 population with the most extensive sample of diabetic patients with chronic HBV  
53  
54 infection available, minimizing the possibility of referral bias. Second, the diabetic  
55  
56  
57  
58  
59  
60

1  
2  
3  
4 HBV cohort comprised 40,162 patients during the 12-year study period, providing  
5  
6  
7 adequate statistical power for the analysis of the risks of MACE, heart failure, and  
8  
9  
10 all-cause mortality in this population. To our knowledge, this study is the largest-scale,  
11  
12  
13 diabetic HBV cohort study to date. In addition, we compared study subjects with  
14  
15 propensity score-matched control subjects, instead of conducting age- and  
16  
17 sex-adjusted analysis in comparison with a general population.  
18  
19

20  
21 Some limitations of our study should be noted. First, absolute values of liver function  
22  
23 tests were not available in the nationwide dataset. An individual with chronic HBV  
24  
25 infection may present as a “healthy” carrier with normal liver function or with chronic  
26  
27 hepatitis. Second, the values of glycated hemoglobin, used widely as a glycemic control  
28  
29 index, were not available in this dataset. Glycemic control may be a confounding factor  
30  
31 for MACE. However, recent reports showed that blood glucose level reduction may  
32  
33 have no beneficial effect or only modest effects on diabetic cardiovascular  
34  
35 complications in high-risk populations (36,37). In addition, the emergence of MACE  
36  
37 caused from poor glycemic control takes a long time (36). Third, some personal  
38  
39 information, including body mass index and smoking status, was not available in the  
40  
41 administrative dataset, preventing accurate assessment of the contributory and  
42  
43 confounding effects of these factors. The effects of chronic HBV infection on MACE  
44  
45 may be due to residual confounding. However, we performed a sensitivity analysis that  
46  
47  
48  
49  
50  
51  
52  
53  
54  
55  
56  
57  
58  
59  
60

1  
2  
3  
4 included positive and negative control outcomes to provide further support for our  
5  
6  
7 findings (38).  
8

9  
10 Despite the abovementioned limitations, we found chronic HBV infection associated  
11  
12 with decreased risk of MACE, heart failure and all-cause mortality in diabetic patients.  
13  
14 These findings may provide new insight into the pathogenesis of diabetes and future  
15  
16 therapeutic strategies. However, further research is necessary to confirm our findings  
17  
18 and to explore the underlying mechanism.  
19  
20  
21  
22  
23  
24  
25  
26  
27  
28  
29

30 **Funding:** This study was supported in part by two research grants: MOST  
31  
32 104-2314-B-075-047 from the Ministry of Science and Technology of Taiwan and  
33  
34 V105C-0207, V106C-045 from Taipei Veterans General Hospital. The aforementioned  
35  
36 funding agencies had no influence on the study design, data collection or analysis,  
37  
38 decision to publish, or preparation of the manuscript.  
39  
40  
41  
42  
43  
44  
45  
46

47 **Conflict of Interest:** No potential conflicts of interest relevant to this article were  
48  
49 reported.  
50  
51  
52  
53  
54  
55

56 **Author contributions:** Y.-T.C. is the guarantor of this work, as such, had full access to  
57  
58  
59  
60

1  
2  
3  
4 all of the data in the study and takes responsibility for the integrity of the data and the  
5  
6 accuracy of the data analysis. Study concept and design: C.-S.K., P.-H.H., Y.-T.C. and  
7  
8 S.-J.L. Acquisition of data: Y.-T.C., C.-Y.H. and C.-C.C. Analysis and interpretation of  
9  
10 data: C.-S.K., Y.-T.C., and P.-H.H.. Drafting of the manuscript: C.-S.K., Y.-T.C., P.-H.H.,  
11  
12 C.-Y.H., and C.-C.C. Statistical analysis: P.-H.H. and Y.-T.C.. Administrative, technical,  
13  
14 or material support: R.-H.C., S.-J.L., S.-C.K., J.-W.C. and S.-J.L.. Critical revision:  
15  
16 Y.-T.C., P.-H.H. and S.-J.L.. Study supervision: P.-H.H. and S.-J.L.. The Corresponding  
17  
18 Authors have the right to grant on behalf of all authors and do grant on behalf of all  
19  
20 authors a worldwide license to the Publisher and its licensees in perpetuity.  
21  
22  
23  
24  
25  
26  
27  
28  
29  
30  
31  
32  
33  
34  
35  
36  
37  
38  
39  
40  
41  
42  
43  
44  
45  
46  
47  
48  
49  
50  
51  
52  
53  
54  
55  
56  
57  
58  
59  
60

## References

1. Wild S, Roglic G, Green A, Sicree R, King H. Global prevalence of diabetes: estimates for the year 2000 and projections for 2030. *Diabetes Care* 2004;27(5):1047–1053
2. Eckel RH, Kahn R, Robertson RM, Rizza RA. Preventing cardiovascular disease and diabetes: a call to action from the American Diabetes Association and the American Heart Association. *Circulation* 2006;113(25):2943–2946
3. Buse JB, Ginsberg HN, Bakris GL, et al.; American Heart Association; American Diabetes Association. Primary prevention of cardiovascular diseases in people with diabetes mellitus: a scientific statement from the American Heart Association and the American Diabetes Association. *Diabetes Care* 2007;30:162–172
4. Ali MK, Bullard KM, Saaddine JB, Cowie CC, Imperatore G, Gregg EW. Achievement of goals in U.S. diabetes care, 1999–2010. *N Engl J Med* 2013;368:1613–1624
5. Domingueti CP, Dusse LM, Carvalho MD, de Sousa LP, Gomes KB, Fernandes AP. Diabetes mellitus: the linkage between oxidative stress, inflammation, hypercoagulability and vascular complications. *J Diabetes Complications* 2016;30(4):738–745
6. Kao JH, Chen DS. Global control of hepatitis B virus infection. *Lancet Infect Dis*



- 1  
2  
3  
4 2002;2(7):395–403  
5  
6  
7 7. Chen CL, Yang JY, Lin SF, Sun CA, Bai CH, You SL, Chen CJ, Kao JH, Chen PJ,  
8  
9  
10 Chen DS. Slow decline of hepatitis B burden in general population: results from a  
11  
12 population-based survey and longitudinal follow-up study in Taiwan. *J Hepatol*  
13  
14 2015;63(2):354–363  
15  
16  
17  
18 8. Chen DS. From hepatitis to hepatoma: lessons from type B viral hepatitis. *Science*  
19  
20 1993;262(5132):369–370  
21  
22  
23  
24 9. Domingueti CP, Dusse LM, Carvalho MD, de Sousa LP, Gomes KB, Fernandes AP.  
25  
26  
27 Diabetes mellitus: the linkage between oxidative stress, inflammation,  
28  
29 hypercoagulability and vascular complications. *J Diabetes Complications*  
30  
31 2016;30(4):738–745  
32  
33  
34  
35  
36 10. Jinjuvadia R, Liangpunsakul S. Association between metabolic syndrome and its  
37  
38 individual components with viral hepatitis B. *Am J Med Sci.* 2014;347(1):23–27  
39  
40  
41  
42 11. Jan CF, Chen CJ, Chiu YH, Chen LS, Wu HM, Huang CC, Yen MF, Chen TH. A  
43  
44 population-based study investigating the association between metabolic  
45  
46 syndrome and hepatitis B/C infection (Keelung Community-based Integrated  
47  
48 Screening study No. 10). *Int J Obes (Lond).* 2006;30(5):794–799.  
49  
50  
51  
52  
53 12. Volzke H, Schwahn C, Wolff B, Mentel R, Robinson DM, Kleine V, Felix SB, John U.  
54  
55  
56 Hepatitis B and C virus infection and the risk of atherosclerosis in a general  
57  
58  
59  
60

- 1  
2  
3  
4 population. *Atherosclerosis* 2004;174:99–103  
5  
6  
7 13. Tong DY, Wang XH, Xu CF, Yang YZ, Xiong SD. Hepatitis B virus infection and  
8  
9 coronary atherosclerosis: results from a population with relatively high prevalence  
10  
11 of hepatitis B virus. *World J Gastroenterol* 2005;11:1292–1296  
12  
13  
14  
15 14. Ishizaka N, Ishizaka Y, Takahashi E, Toda EE, Hashimoto H, Ohno M, Nagai R,  
16  
17 Yamakado M. Increased prevalence of carotid atherosclerosis in hepatitis B virus  
18  
19 carriers. *Circulation* 2002;105:1028–1030  
20  
21  
22  
23  
24 15. Sung J, Song YM, Choi YH, Ebrahim S, Davey SG. Hepatitis B virus seropositivity  
25  
26 and the risk of stroke and myocardial infarction. *Stroke* 2007;38:1436–1441  
27  
28  
29  
30 16. Wang CH, Chen CJ, Lee MH, Yang HI, Hsiao CK. Chronic hepatitis B infection and  
31  
32 risk of atherosclerosis-related mortality: a 17-year follow-up study based on 22,472  
33  
34 residents in Taiwan. *Atherosclerosis* 2010;211(2):624–629  
35  
36  
37  
38 17. Chen CJ, Yang HI, Su J, Jen CL, You SL, Lu SN, Huang GT, Iloeje UH;  
39  
40 REVEAL-HBV Study Group. Risk of hepatocellular carcinoma across a biological  
41  
42 gradient of serum hepatitis B virus DNA level. *JAMA* 2006;295:65–73  
43  
44  
45  
46  
47 18. Chao TF, Liu CJ, Chen SJ, Wang KL, Lin YJ, Chang SL, Lo LW, Hu YF, Tuan TC,  
48  
49 Chen TJ, Tsao HM, Chen SA. Hyperuricemia and the risk of ischemic stroke in  
50  
51 patients with atrial fibrillation: could it refine clinical risk stratification in AF? *Int J*  
52  
53  
54  
55  
56  
57  
58  
59  
60  
*Cardiol* 2014;170:344–349

- 1  
2  
3  
4 19. Chiu CC, Huang CC, Chan WL, Chung CM, Huang PH, Lin SJ, Chen JW, Leu HB.  
5  
6 Increased risk of ischemic stroke in patients with systemic lupus erythematosus: a  
7  
8 nationwide population-based study. *Intern Med* 2012;51:17–21  
9  
10  
11  
12 20. Lin CC, Lai MS, Syu CY, Chang SC, Tseng FY. Accuracy of diabetes diagnosis in  
13  
14 health insurance claims data in Taiwan. *J Formos Med Assoc* 2005;104:157–163  
15  
16  
17  
18 21. Cheng CL, Kao YH, Lin SJ, Lee CH, Lai ML. Validation of the National Health  
19  
20 Insurance Research Database with ischemic stroke cases in Taiwan.  
21  
22 *Pharmacoepidemiol Drug Saf* 2011;20:236–242  
23  
24  
25  
26  
27 22. Wu CY, Lin JT, Ho HJ, Su CW, Lee TY, Wang SY, Wu C, Wu JC. Association of  
28  
29 nucleos(t)ide analogue therapy with reduced risk of hepatocellular carcinoma in  
30  
31 patients with chronic hepatitis B: a nationwide cohort study. *Gastroenterology*  
32  
33 2014;147(1):143–151  
34  
35  
36  
37  
38 23. Cheng CL, Lee CH, Chen PS, Li YH, Lin SJ, Yang YH. Validation of acute  
39  
40 myocardial infarction cases in the national health insurance research database in  
41  
42 Taiwan. *J Epidemiol* 2014;24:500–507  
43  
44  
45  
46  
47 24. Charlson ME, Pompei P, Ales KL, MacKenzie CR. A new method of classifying  
48  
49 prognostic comorbidity in longitudinal studies: development and validation. *J Chron*  
50  
51 *Dis* 1987;40:373–383  
52  
53  
54  
55  
56 25. Austin PC. A critical appraisal of propensity-score matching in the medical literature  
57  
58  
59  
60

- 1  
2  
3  
4 between 1996 and 2003. *Stat Med* 2008;27:2037–2049
- 5  
6  
7 26. Fine JP, Gray RJ. A proportional hazards model for the subdistribution of a  
8  
9 competing risk. *J Am Stat Assoc* 1999;94:496–509
- 10  
11  
12 27. Kim CM, Koike K, Saito I, Miyamura T, Jay G. HBx gene of hepatitis B virus  
13  
14 induces liver cancer in transgenic mice. *Nature*. 1991;23;351(6324):317–320
- 15  
16  
17  
18 28. Yu DY, Moon HB, Son JK, et al. Incidence of hepatocellular carcinoma in  
19  
20 transgenic mice expressing the hepatitis B virus X-protein. *J Hepatol*.  
21  
22 1999;31(1):123–132
- 23  
24  
25  
26 29. Kim KH, Shin HJ, Kim K, et al. Hepatitis B virus X protein induces hepatic  
27  
28 steatosis via transcriptional activation of SREBP1 and PPARgamma.  
29  
30  
31  
32  
33 *Gastroenterology*. 2007;132(5):1955–1967.
- 34  
35  
36 30. Jarcuska P, Drazilova S, Fedacko J, Pella D, Janicko M. Association between  
37  
38 hepatitis B and metabolic syndrome: Current state of the art. *World J*  
39  
40  
41  
42 *Gastroenterol*. 2016;22(1):155–164
- 43  
44  
45 31. Meade TW, Stirling Y, Thompson SG, Ajdukiewicz A, Barbara JA, Chalmers DM.  
46  
47 Carriers of hepatitis B surface antigen: possible association between low levels of  
48  
49 clotting factors and protection against ischaemic heart disease. *Thromb Res*  
50  
51  
52 1987;45(5):709–713
- 53  
54  
55  
56 32. Crook PD, Jones ME, Hall AJ. Mortality of hepatitis B surface antigen-positive  
57  
58  
59  
60

- 1  
2  
3  
4 blood donors in England and Wales. *Int J Epidemiol* 2003;32:118–124  
5  
6  
7 33. Amin J, Law MG, Bartlett M, Kaldor JM, Dore GJ. Causes of death after diagnosis  
8  
9 of hepatitis B or hepatitis C infection: a large community-based linkage study.  
10  
11  
12 *Lancet* 2006;368(9539):938–945  
13  
14  
15 34. Chen G, Lin W, Shen F, Iloeje UH, London WT, Evans AA. Chronic hepatitis B  
16  
17 virus infection and mortality from non-liver causes: results from the Haimen City  
18  
19 cohort study. *Int J Epidemiol* 2005;34:132–137  
20  
21  
22  
23  
24 35. Haffner SM, Lehto S, Ronnema T, Pyorala K, Laakso M. Mortality from coronary  
25  
26 heart disease in subjects with type 2 diabetes and in nondiabetic subjects with and  
27  
28 without prior myocardial infarction. *N Engl J Med* 1998;339:229–234  
29  
30  
31  
32  
33 36. Hayward RA, Reaven PD, Wiitala WL, Bahn GD, Reda DJ, Ge L, McCarren M,  
34  
35 Duckworth WC, Emanuele NV; VADT Investigators. Follow-up of glycemetic  
36  
37 control and cardiovascular outcomes in type 2 diabetes. *N Engl J Med*  
38  
39 2015;372(23):2197–2206  
40  
41  
42  
43  
44 37. ACCORD Study Group Writing Committee. 9-year effects of 3.7 years of  
45  
46 intensive glycemetic control on cardiovascular outcomes. *Diabetes Care*  
47  
48 2016;39(5):701–708  
49  
50  
51  
52  
53 38. Lipsitch M, Tchetgen Tchetgen E, Cohen T. Negative controls: a tool for detecting  
54  
55 confounding and bias in observational studies. *Epidemiology* 2010;21(3):383–  
56  
57  
58  
59  
60

388

For peer review only

1  
2  
3  
4  
5  
6  
7  
8  
9  
10  
11  
12  
13  
14  
15  
16  
17  
18  
19  
20  
21  
22  
23  
24  
25  
26  
27  
28  
29  
30  
31  
32  
33  
34  
35  
36  
37  
38  
39  
40  
41  
42  
43  
44  
45  
46  
47  
48  
49  
50  
51  
52  
53  
54  
55  
56  
57  
58  
59  
60

## FIGURE LEGENDS

**Figure 1.** Study patient selection flow diagram. The study cohort consisted of 40,162 diabetic patients with chronic HBV infection and 40,162 matched control subjects without HBV infection.

**Figure 2.** The cumulative incidence of all-cause mortality (A) and major adverse cardiovascular events (B) among diabetic patients with chronic HBV infection and matched control subjects without HBV infection.

**Figure 3.** Multivariable stratified subgroup analyses. The effects of chronic HBV infection on all-cause mortality (A) and major adverse cardiovascular events (B).

**Table 1—Baseline characteristics of diabetic patients**

| Characteristic                                                                   | Propensity Score–Matched |                | Standardized difference* |
|----------------------------------------------------------------------------------|--------------------------|----------------|--------------------------|
|                                                                                  | HBV cohort               | Control cohort |                          |
| Patients ( <i>n</i> )                                                            | 40,162                   | 40,162         |                          |
| Mean age (SD), years                                                             | 52.7 (11.6)              | 52.7 (11.5)    | 0.002                    |
| Sex (male)                                                                       | 25,173 (62.7)            | 25,173 (62.7)  | 0.000                    |
| Monthly income, NT\$                                                             |                          |                |                          |
| Dependent                                                                        | 8,787 (21.9)             | 8,510 (21.2)   | 0.017                    |
| <19,100                                                                          | 6,859 (17.1)             | 6,342 (15.8)   | 0.035                    |
| 19,100–41,999                                                                    | 18,910 (47.1)            | 19,343 (48.2)  | -0.022                   |
| ≥42,000                                                                          | 5,606 (14.0)             | 5,967 (14.9)   | -0.026                   |
| Urbanization level                                                               |                          |                |                          |
| 1 (urban area)                                                                   | 14,845 (37.0)            | 15,501 (38.6)  | -0.034                   |
| 2                                                                                | 23,400 (58.3)            | 22,828 (56.8)  | 0.029                    |
| 3                                                                                | 1,593 (4.0)              | 1,498 (3.7)    | 0.012                    |
| 4 (rural area)                                                                   | 324 (0.8)                | 335 (0.8)      | -0.003                   |
| Outpatient visits to metabolism and endocrinology professionals in the past year |                          |                |                          |
| 0–5                                                                              | 35,055 (87.3)            | 34,947 (87.0)  | 0.008                    |
| 6–10                                                                             | 3,752 (9.3)              | 3,774 (9.4)    | -0.002                   |
| 11–15                                                                            | 975 (2.4)                | 1,049 (2.6)    | -0.012                   |
| >15                                                                              | 380 (0.9)                | 382 (1.0)      | -0.003                   |
| Charlson Comorbidity Index score, median (IQR)                                   | 6 (5–8)                  | 6 (4–8)        | 0.035                    |
| Adapted Diabetes Complications Severity Index score, median (IQR) <sup>†</sup>   | 0 (0–1)                  | 0 (0–1)        | -0.001                   |
| Median (IQR) duration of diabetes mellitus, months                               | 38 (12–74)               | 39 (16–73)     | -0.024                   |
| Anti-hypertensive drug use                                                       |                          |                |                          |
| Alpha blocker                                                                    | 420 (1.0)                | 362 (0.9)      | 0.015                    |
| ACE inhibitor or ARB                                                             | 3,885 (9.7)              | 3,950 (9.8)    | -0.005                   |
| Beta blocker                                                                     | 3,256 (8.1)              | 3,337 (8.3)    | -0.007                   |
| Calcium channel blocker                                                          | 3,887 (9.7)              | 3,866 (9.6)    | 0.002                    |
| Diuretic                                                                         | 2,701 (6.7)              | 2,507 (6.2)    | 0.020                    |



|    |                                                                                              |               |               |        |
|----|----------------------------------------------------------------------------------------------|---------------|---------------|--------|
| 1  |                                                                                              |               |               |        |
| 2  |                                                                                              |               |               |        |
| 3  | Anti-diabetic drug use                                                                       |               |               |        |
| 4  |                                                                                              |               |               |        |
| 5  | Acarbose                                                                                     | 823 (2.0)     | 886 (2.2)     | -0.011 |
| 6  | Sulfonylurea                                                                                 | 7,374 (18.4)  | 7,795 (19.4)  | -0.027 |
| 7  | Insulin                                                                                      | 865 (2.2)     | 831 (2.1)     | 0.006  |
| 8  |                                                                                              |               |               |        |
| 9  | Metformin                                                                                    | 6,921 (17.2)  | 7,235 (18.0)  | -0.021 |
| 10 | Thiazolidinedione                                                                            | 689 (1.7)     | 707 (1.8)     | -0.003 |
| 11 | Dipeptidyl peptidase-4 inhibitor                                                             | 398 (1.0)     | 458 (1.1)     | -0.015 |
| 12 |                                                                                              |               |               |        |
| 13 | Other concomitant medications                                                                |               |               |        |
| 14 |                                                                                              |               |               |        |
| 15 | Antiplatelet agent                                                                           | 2,097 (5.2)   | 2,073 (5.2)   | 0.003  |
| 16 | NSAID                                                                                        | 8,662 (21.6)  | 8,728 (21.7)  | -0.004 |
| 17 | Proton pump inhibitor                                                                        | 1,836 (4.6)   | 1,436 (3.6)   | 0.050  |
| 18 | Steroid                                                                                      | 2,005 (5.0)   | 1,942 (4.8)   | 0.007  |
| 19 | Antidepressant                                                                               | 1,117 (2.8)   | 1,137 (2.8)   | -0.003 |
| 20 |                                                                                              |               |               |        |
| 21 | Statin                                                                                       | 1,701 (4.2)   | 1,718 (4.3)   | -0.002 |
| 22 |                                                                                              |               |               |        |
| 23 | Comorbidities                                                                                |               |               |        |
| 24 |                                                                                              |               |               |        |
| 25 | Coronary artery disease                                                                      | 9,694 (24.1)  | 9,731 (24.2)  | -0.002 |
| 26 | Hypertension                                                                                 | 19,839 (49.4) | 19,859 (49.4) | -0.001 |
| 27 | Heart failure                                                                                | 2,002 (5.0)   | 1,791 (4.5)   | 0.025  |
| 28 | Peripheral vascular disease                                                                  | 1,369 (3.4)   | 1,543 (3.8)   | -0.023 |
| 29 | Chronic kidney disease                                                                       | 5,929 (14.8)  | 5,916 (14.7)  | 0.001  |
| 30 | Atrial fibrillation                                                                          | 472 (1.2)     | 399 (1.0)     | 0.018  |
| 31 | Dyslipidemia                                                                                 | 22,827 (56.8) | 23,813 (59.3) | -0.050 |
| 32 | Valvular heart disease                                                                       | 2,588 (6.4)   | 2,547 (6.3)   | 0.004  |
| 33 | Cancer                                                                                       | 6,835 (17.0)  | 6,546 (16.3)  | 0.019  |
| 34 | Autoimmune disease                                                                           | 1,543 (3.8)   | 1,559 (3.9)   | -0.002 |
| 35 | Dialysis                                                                                     | 386 (1.0)     | 345 (0.9)     | 0.011  |
| 36 | Physical limitation                                                                          | 1,592 (4.0)   | 1,606 (4.0)   | -0.002 |
| 37 |                                                                                              |               |               |        |
| 38 | Propensity score, mean (SD)                                                                  | 0.08 (0.06)   | 0.08 (0.06)   | 0.000  |
| 39 |                                                                                              |               |               |        |
| 40 |                                                                                              |               |               |        |
| 41 |                                                                                              |               |               |        |
| 42 |                                                                                              |               |               |        |
| 43 |                                                                                              |               |               |        |
| 44 | Data are presented as <i>n</i> (%) except where otherwise indicated.                         |               |               |        |
| 45 | *Imbalance defined as absolute value > 0.014.                                                |               |               |        |
| 46 | †A 13-point scale with 7 complication categories: retinopathy, nephropathy,                  |               |               |        |
| 47 | neuropathy, cerebrovascular, cardiovascular, peripheral vascular disease, and                |               |               |        |
| 48 | metabolic. Each complication is given a numeric score ranging from 0 to 2 (0 = no            |               |               |        |
| 49 | abnormality, 1 = some abnormality, 2 = severe abnormality).                                  |               |               |        |
| 50 | <i>Abbreviations:</i> IQR, interquartile range; ARB, angiotensin II receptor blocker; NSAID, |               |               |        |
| 51 | non-steroidal anti-inflammatory drug.                                                        |               |               |        |
| 52 |                                                                                              |               |               |        |
| 53 |                                                                                              |               |               |        |
| 54 |                                                                                              |               |               |        |
| 55 |                                                                                              |               |               |        |
| 56 |                                                                                              |               |               |        |
| 57 |                                                                                              |               |               |        |
| 58 |                                                                                              |               |               |        |
| 59 |                                                                                              |               |               |        |
| 60 |                                                                                              |               |               |        |

1  
2  
3  
4**Table 2—Incidence and risks of all-cause mortality, myocardial infarction, stroke, hospitalization for heart failure, and cancer after propensity score matching**

|                       | HBV cohort    |              |                 | Control cohort (reference) |              |                 | Crude                 |                | Adjusted               |                | Competing risk        |                |
|-----------------------|---------------|--------------|-----------------|----------------------------|--------------|-----------------|-----------------------|----------------|------------------------|----------------|-----------------------|----------------|
|                       | No. of events | Person-years | Incidence rate* | No. of events              | Person-years | Incidence rate* | Hazard ratio (95% CI) | <i>p</i> value | Hazard ratio† (95% CI) | <i>p</i> value | Hazard ratio (95% CI) | <i>p</i> value |
| All-cause mortality   | 6,027         | 223,588      | 26.96           | 7,140                      | 202,307      | 35.29           | 0.78 (0.76–0.81)      | <0.001         | 0.72 (0.70–0.75)       | <0.001         |                       |                |
| MACE‡                 | 1,098         | 220,605      | 4.98            | 1,663                      | 198,131      | 8.39            | 0.59 (0.55–0.64)      | <0.001         | 0.58 (0.53–0.62)       | <0.001         | 0.62 (0.57–0.66)      | <0.001         |
| Myocardial infarction | 308           | 222,847      | 1.38            | 554                        | 201,078      | 2.76            | 0.50 (0.43–0.57)      | <0.001         | 0.49 (0.42–0.56)       | <0.001         | 0.52 (0.45–0.60)      | <0.001         |
| Ischemic stroke       | 822           | 221,298      | 3.71            | 1,171                      | 199,259      | 5.88            | 0.63 (0.57–0.69)      | <0.001         | 0.61 (0.56–0.67)       | <0.001         | 0.66 (0.60–0.72)      | <0.001         |
| Heart failure         | 249           | 223,050      | 1.12            | 405                        | 201,494      | 2.01            | 0.55 (0.47–0.65)      | <0.001         | 0.50 (0.43–0.59)       | <0.001         | 0.58 (0.49–0.68)      | <0.001         |
| HCC                   | 1,590         | 220,573      | 7.21            | 153                        | 202,145      | 0.76            | 9.58 (8.12–11.31)     | <0.001         | 9.34 (7.91–11.03)      | <0.001         | 10.06 (8.52–11.87)    | <0.001         |
| Acute appendicitis    | 222           | 222,682      | 1.00            | 179                        | 201,644      | 0.89            | 1.13 (0.93–1.37)      | 0.233          | 1.13 (0.93–1.38)       | 0.227          | 1.18 (0.97–1.43)      | 0.102          |

\*Per 10<sup>3</sup> person-years.

†Adjusted for monthly income, urbanization level, Charlson Comorbidity Index score, dipeptidyl peptidase-4 inhibitor use, metformin use, sulfonylurea use, alpha blocker use, dyslipidemia, atrial fibrillation, peripheral vascular disease, and heart failure.

‡Myocardial infarction and ischemic stroke.

33  
34  
35  
36  
37  
38  
39  
40  
41  
42  
43  
44  
45  
46  
47  
48  
49

1  
2  
3  
4  
5  
6  
7  
8  
9  
10  
11  
12  
13  
14  
15  
16  
17  
18  
19  
20  
21  
22  
23  
24  
25  
26  
27  
28  
29  
30  
31  
32  
33  
34  
35  
36  
37  
38  
39  
40  
41  
42  
43  
44  
45  
46  
47  
48  
49  
50  
51  
52  
53  
54  
55  
56  
57  
58  
59  
60

For peer review only

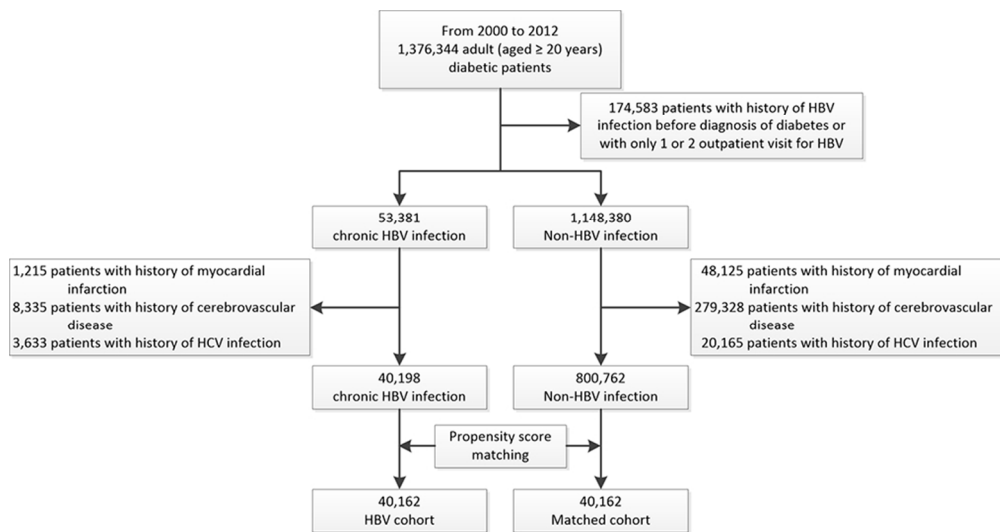

Figure 1. Study patient selection flow diagram. The study cohort consisted of 40,162 diabetic patients with chronic HBV infection and 40,162 matched control subjects without HBV infection.

86x45mm (300 x 300 DPI)

review only

1  
2  
3  
4  
5  
6  
7  
8  
9  
10  
11  
12  
13  
14  
15  
16  
17  
18  
19  
20  
21  
22  
23  
24  
25  
26  
27  
28  
29  
30  
31  
32  
33  
34  
35  
36  
37  
38

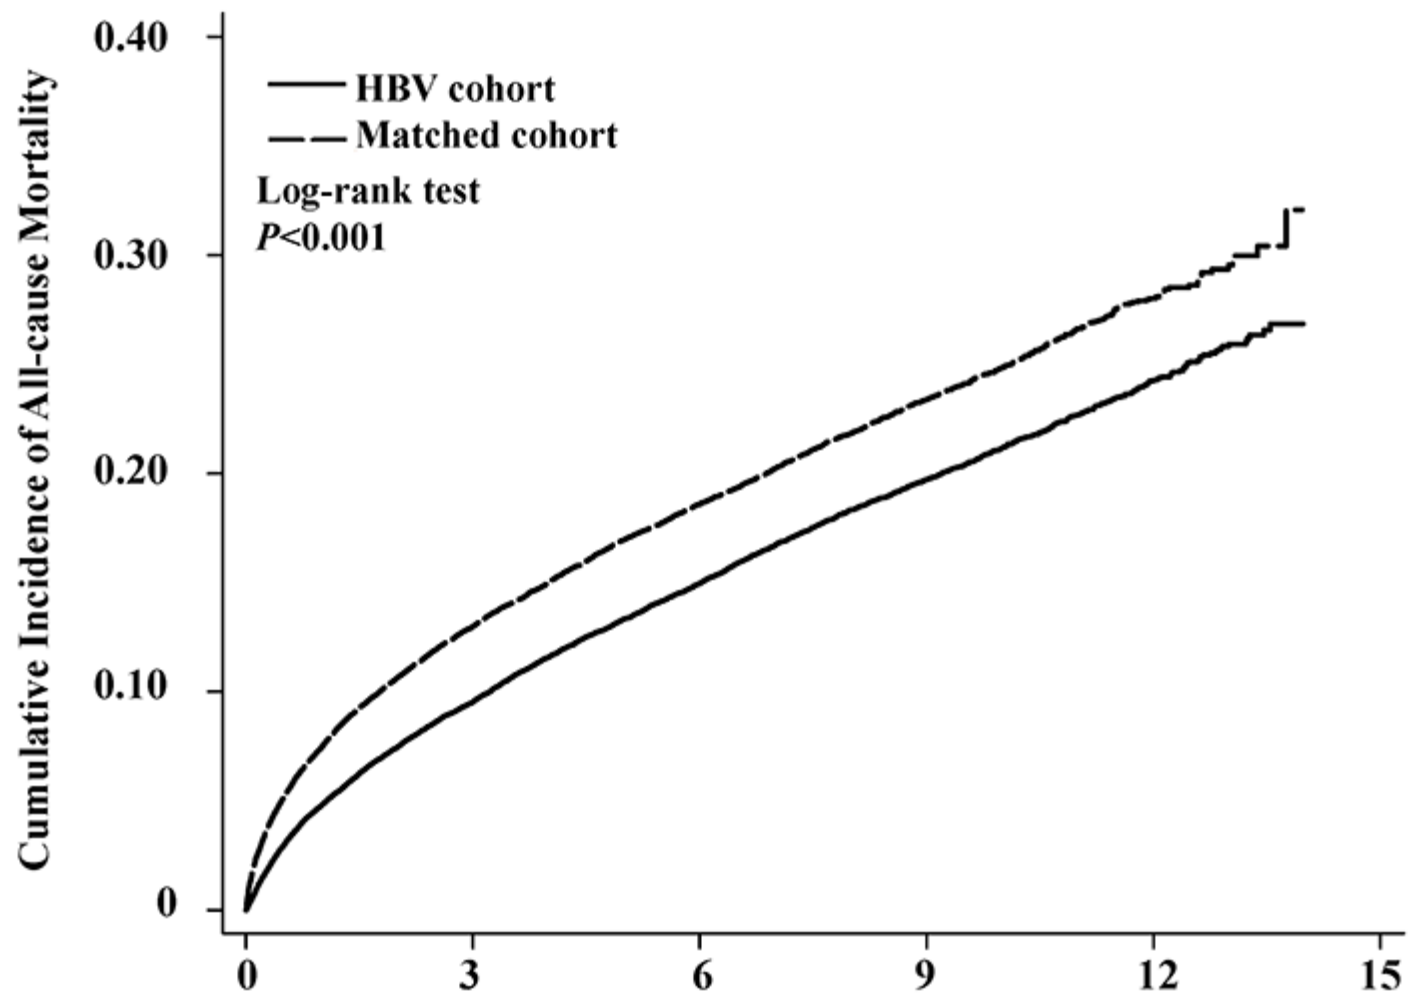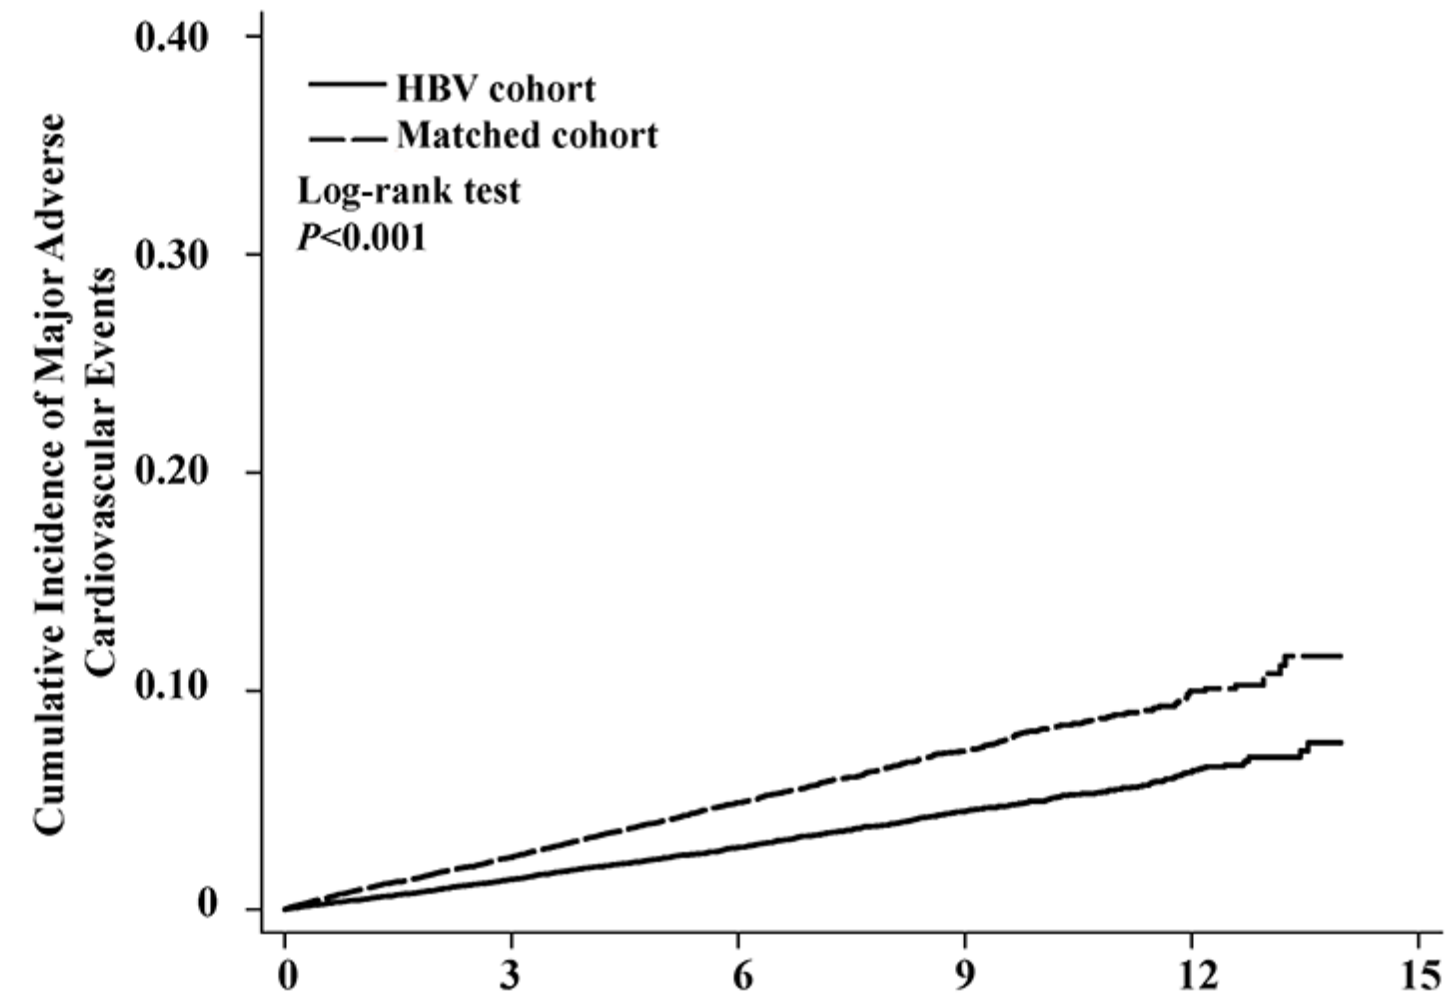

| No. of patients at risk | 0      | 3      | 6      | 9     | 12    | 15    |
|-------------------------|--------|--------|--------|-------|-------|-------|
| <b>HBV cohort</b>       | 40,162 | 28,673 | 17,029 | 7,548 | 2,952 | 1,002 |
| <b>Matched cohort</b>   | 40,162 | 26,903 | 15,020 | 5,654 | 1,145 | 302   |

| No. of patients at risk | 0      | 3      | 6      | 9     | 12    | 15    |
|-------------------------|--------|--------|--------|-------|-------|-------|
| <b>HBV cohort</b>       | 40,162 | 28,364 | 16,693 | 7,320 | 1,958 | 1,002 |
| <b>Matched cohort</b>   | 40,162 | 26,454 | 14,497 | 5,373 | 1,048 | 302   |

**A**

**B**

1  
2  
3  
4  
5  
6  
7  
8  
9  
10  
11  
12  
13  
14  
15  
16  
17  
18  
19  
20  
21  
22  
23  
24  
25  
26  
27  
28  
29  
30  
31  
32  
33  
34  
35  
36  
37  
38

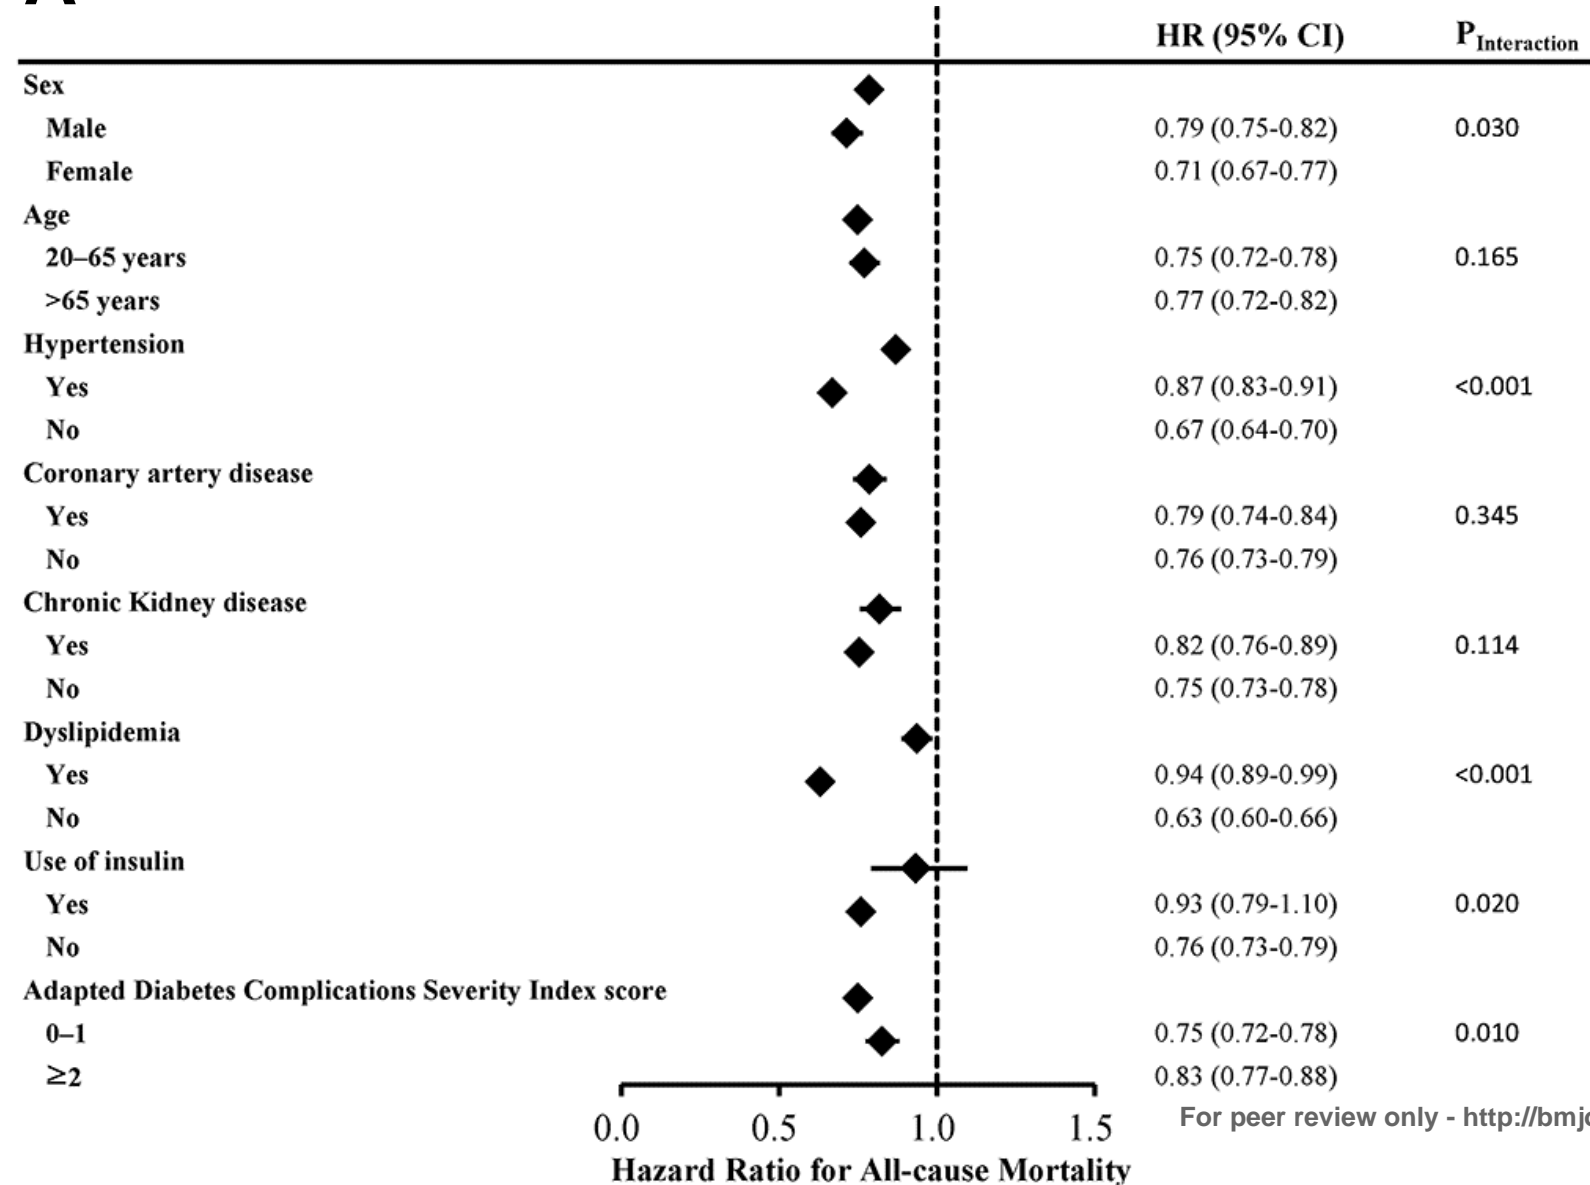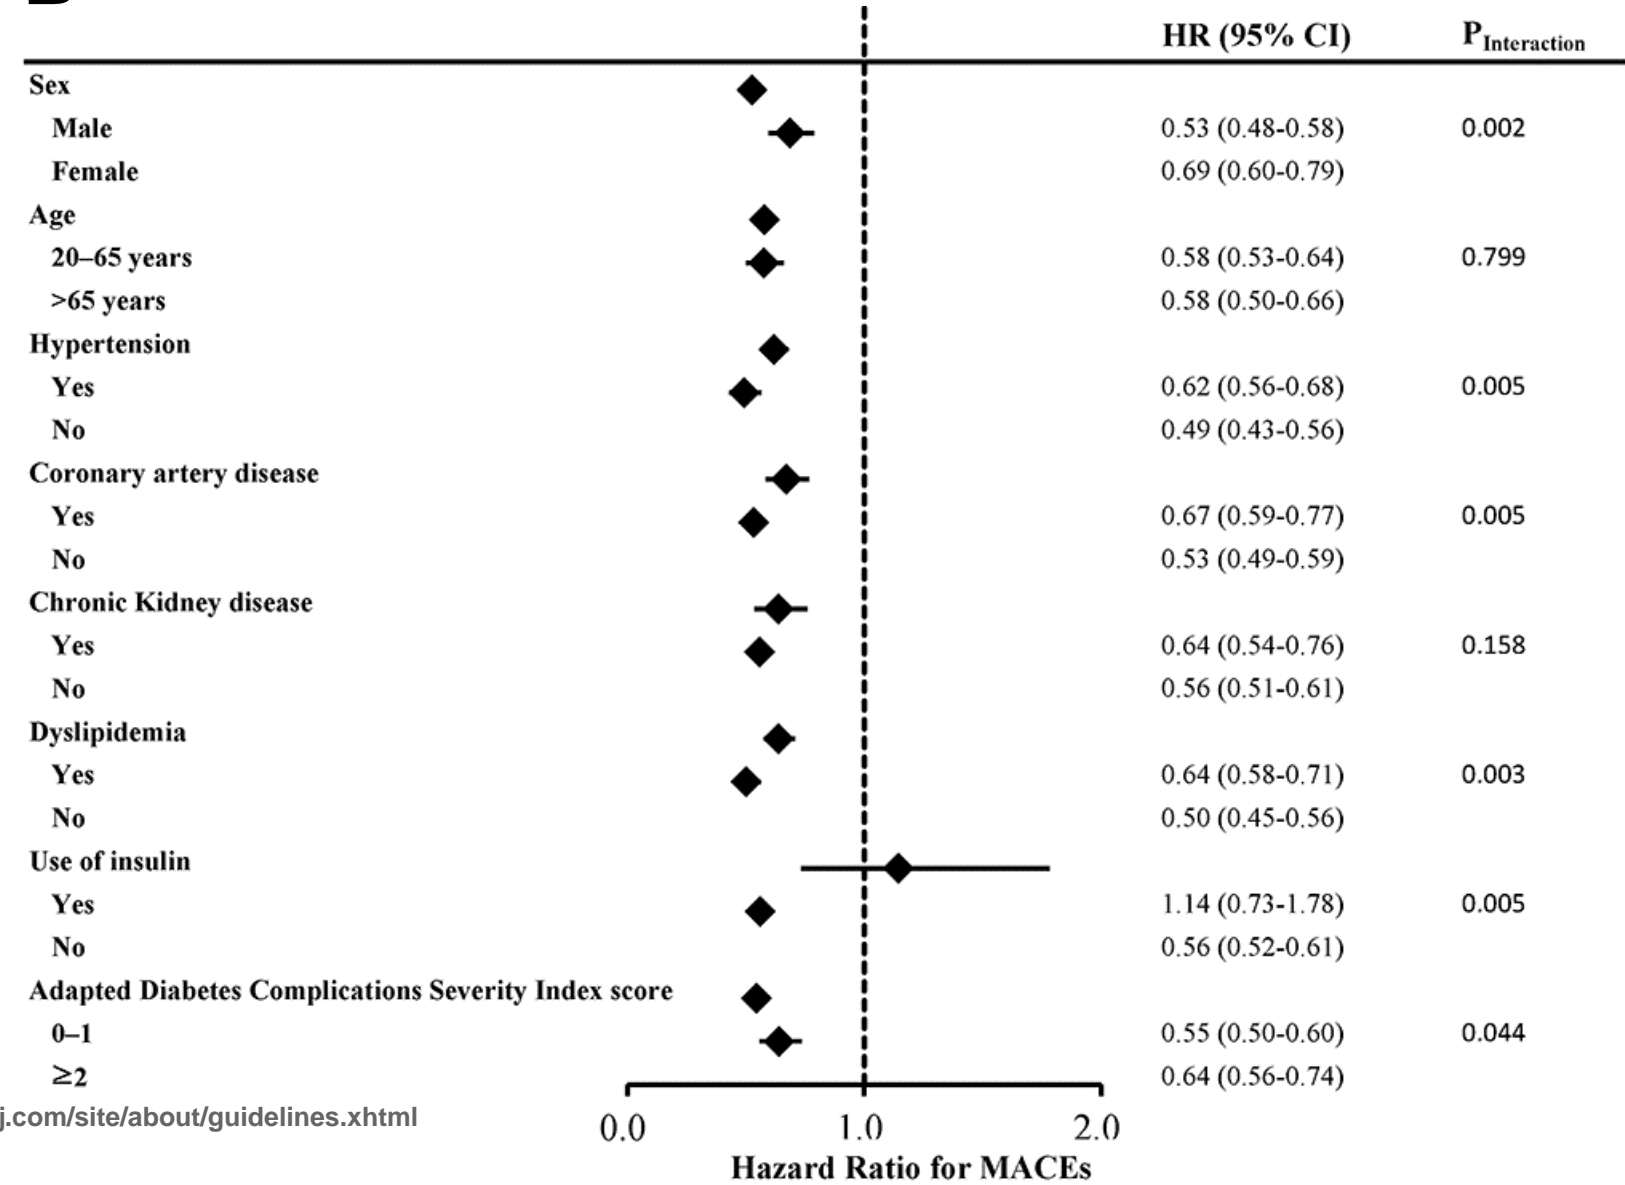

**Supplemental Table A1—Propensity score model results of probability of diagnosis of HBV infection**

| Parameter            | Estimate | Odds Ratio | 95% CI |       | p value |
|----------------------|----------|------------|--------|-------|---------|
|                      |          |            | Lower  | Upper |         |
| Age, per year        | -0.0411  | 0.96       | 0.959  | 0.961 | <0.0001 |
| Male                 | 0.4718   | 1.603      | 1.568  | 1.638 | <0.0001 |
| Year of index date   |          |            |        |       |         |
| 2000                 |          | 1          |        |       |         |
| 2001                 | -0.1146  | 0.892      | 0.822  | 0.967 | 0.0055  |
| 2002                 | -0.2589  | 0.772      | 0.714  | 0.835 | <0.0001 |
| 2003                 | -0.4023  | 0.669      | 0.619  | 0.723 | <0.0001 |
| 2004                 | -0.4794  | 0.619      | 0.575  | 0.667 | <0.0001 |
| 2005                 | -0.5758  | 0.562      | 0.523  | 0.605 | <0.0001 |
| 2006                 | -0.6641  | 0.515      | 0.479  | 0.553 | <0.0001 |
| 2007                 | -0.7626  | 0.466      | 0.434  | 0.501 | <0.0001 |
| 2008                 | -0.8804  | 0.415      | 0.386  | 0.446 | <0.0001 |
| 2009                 | -0.9874  | 0.373      | 0.347  | 0.401 | <0.0001 |
| 2010                 | -1.0996  | 0.333      | 0.31   | 0.358 | <0.0001 |
| 2011                 | -1.2988  | 0.273      | 0.254  | 0.293 | <0.0001 |
| 2012                 | -1.3871  | 0.25       | 0.232  | 0.269 | <0.0001 |
| Month of index date  |          |            |        |       |         |
| January              |          | 1          |        |       |         |
| February             | -0.0141  | 0.986      | 0.933  | 1.042 | 0.6135  |
| March                | -0.0354  | 0.965      | 0.916  | 1.016 | 0.18    |
| April                | -0.0224  | 0.978      | 0.929  | 1.03  | 0.3935  |
| May                  | -0.044   | 0.957      | 0.909  | 1.007 | 0.0913  |
| June                 | -0.0566  | 0.945      | 0.897  | 0.995 | 0.0315  |
| July                 | -0.0694  | 0.933      | 0.887  | 0.982 | 0.0074  |
| August               | -0.0812  | 0.922      | 0.876  | 0.97  | 0.0017  |
| September            | -0.1023  | 0.903      | 0.858  | 0.95  | <0.0001 |
| October              | -0.0938  | 0.91       | 0.865  | 0.958 | 0.0003  |
| November             | -0.116   | 0.891      | 0.846  | 0.937 | <0.0001 |
| December             | -0.1214  | 0.886      | 0.842  | 0.932 | <0.0001 |
| Monthly income, NT\$ |          |            |        |       |         |
| Dependent            |          | 1          |        |       |         |
| <19,100              | -0.1658  | 0.847      | 0.819  | 0.876 | <0.0001 |
| 19,100–41,999        | 0.1102   | 1.116      | 1.087  | 1.147 | <0.0001 |
| ≥42,000              | 0.2833   | 1.328      | 1.279  | 1.377 | <0.0001 |

|    |                                                                                  |         |       |       |       |         |
|----|----------------------------------------------------------------------------------|---------|-------|-------|-------|---------|
| 1  |                                                                                  |         |       |       |       |         |
| 2  |                                                                                  |         |       |       |       |         |
| 3  | Urbanization level                                                               |         |       |       |       |         |
| 4  | 1 (urban area)                                                                   |         | 1     |       |       |         |
| 5  |                                                                                  |         |       |       |       |         |
| 6  | 2                                                                                | -0.0904 | 0.914 | 0.894 | 0.934 | <0.0001 |
| 7  | 3                                                                                | -0.1119 | 0.894 | 0.847 | 0.944 | <0.0001 |
| 8  |                                                                                  |         |       |       |       |         |
| 9  | 4 (rural area)                                                                   | -0.0171 | 0.983 | 0.877 | 1.103 | 0.7708  |
| 10 |                                                                                  |         |       |       |       |         |
| 11 | Outpatient visits to metabolism and endocrinology professionals in the past year |         |       |       |       |         |
| 12 | 0                                                                                |         |       |       |       |         |
| 13 | 1–5                                                                              | 0.158   | 1.171 | 1.13  | 1.214 | <0.0001 |
| 14 | 6–10                                                                             | -0.1084 | 0.897 | 0.84  | 0.959 | 0.0014  |
| 15 |                                                                                  |         |       |       |       |         |
| 16 | >10                                                                              | -0.0625 | 0.939 | 0.845 | 1.044 | 0.2474  |
| 17 |                                                                                  |         |       |       |       |         |
| 18 | Charlson Comorbidity Index score <sup>a</sup>                                    | 0.1398  | 1.15  | 1.143 | 1.157 | <0.0001 |
| 19 | Adapted Diabetes Complications                                                   |         | 0.93  | 0.917 | 0.942 | <0.0001 |
| 20 | Severity Index score <sup>b</sup>                                                | -0.073  |       |       |       | <0.0001 |
| 21 |                                                                                  |         |       |       |       |         |
| 22 | Duration of diabetes, months                                                     | 0.0028  | 1.003 | 1.003 | 1.003 | <0.0001 |
| 23 |                                                                                  |         |       |       |       |         |
| 24 | Anti-diabetic drugs                                                              |         |       |       |       |         |
| 25 | Acarbose                                                                         | 0.0507  | 1.052 | 0.977 | 1.133 | 0.18    |
| 26 | Sulfonylurea                                                                     | 0.1154  | 1.122 | 1.084 | 1.162 | <0.0001 |
| 27 | Insulin                                                                          | 0.2091  | 1.233 | 1.145 | 1.327 | <0.0001 |
| 28 | Metformin                                                                        | 0.151   | 1.163 | 1.122 | 1.206 | <0.0001 |
| 29 | Thiazolidinedione                                                                | -0.3096 | 0.734 | 0.677 | 0.795 | <0.0001 |
| 30 | Dipeptidyl peptidase-4 inhibitor                                                 | 0.0812  | 1.085 | 0.976 | 1.205 | 0.1308  |
| 31 |                                                                                  |         |       |       |       |         |
| 32 | Anti-hypertensive drugs                                                          |         |       |       |       |         |
| 33 | Alpha blocker                                                                    | -0.081  | 0.922 | 0.833 | 1.02  | 0.1164  |
| 34 | Beta blocker                                                                     | 0.032   | 1.032 | 0.991 | 1.076 | 0.1247  |
| 35 | Calcium channel blocker                                                          | -0.0569 | 0.945 | 0.908 | 0.982 | 0.0044  |
| 36 | Diuretic                                                                         | 0.3296  | 1.39  | 1.33  | 1.454 | <0.0001 |
| 37 | ACE inhibitor/ARB                                                                | -0.0856 | 0.918 | 0.882 | 0.955 | <0.0001 |
| 38 |                                                                                  |         |       |       |       |         |
| 39 | Other concomitant medications                                                    |         |       |       |       |         |
| 40 | Antiplatelet                                                                     | -0.185  | 0.831 | 0.791 | 0.873 | <0.0001 |
| 41 | Steroid                                                                          | -0.1578 | 0.854 | 0.814 | 0.896 | <0.0001 |
| 42 | Antidepressant                                                                   | 0.0542  | 1.056 | 0.991 | 1.125 | 0.0936  |
| 43 | Statin                                                                           | -0.4718 | 0.624 | 0.592 | 0.658 | <0.0001 |
| 44 | PPI                                                                              | 1.1059  | 3.022 | 2.864 | 3.189 | <0.0001 |
| 45 | NSAID                                                                            | 0.0767  | 1.08  | 1.053 | 1.108 | <0.0001 |
| 46 |                                                                                  |         |       |       |       |         |
| 47 | Comorbidities                                                                    |         |       |       |       |         |
| 48 | Hypertension                                                                     | -0.1764 | 0.838 | 0.818 | 0.859 | <0.0001 |
| 49 | Coronary artery disease                                                          | 0.0571  | 1.059 | 1.028 | 1.09  | 0.0002  |
| 50 | Heart failure                                                                    | -0.3525 | 0.703 | 0.666 | 0.741 | <0.0001 |
| 51 |                                                                                  |         |       |       |       |         |
| 52 |                                                                                  |         |       |       |       |         |
| 53 |                                                                                  |         |       |       |       |         |
| 54 |                                                                                  |         |       |       |       |         |
| 55 |                                                                                  |         |       |       |       |         |
| 56 |                                                                                  |         |       |       |       |         |
| 57 |                                                                                  |         |       |       |       |         |
| 58 |                                                                                  |         |       |       |       |         |
| 59 |                                                                                  |         |       |       |       |         |
| 60 |                                                                                  |         |       |       |       |         |



|    |                        |         |       |       |       |         |
|----|------------------------|---------|-------|-------|-------|---------|
| 1  |                        |         |       |       |       |         |
| 2  |                        |         |       |       |       |         |
| 3  | Peptic ulcer disease   | 0.1731  | 1.189 | 1.162 | 1.217 | <0.0001 |
| 4  | Chronic kidney disease | 0.0234  | 1.024 | 0.993 | 1.055 | 0.1335  |
| 5  |                        |         |       |       |       |         |
| 6  | Atrial fibrillation    | -0.1366 | 0.872 | 0.792 | 0.961 | 0.0057  |
| 7  |                        |         |       |       |       |         |
| 8  | Dyslipidemia           | 0.103   | 1.108 | 1.084 | 1.133 | <0.0001 |
| 9  | Valvular heart disease | 0.0353  | 1.036 | 0.992 | 1.082 | 0.1102  |
| 10 |                        |         |       |       |       |         |
| 11 | Cancer                 | 0.1052  | 1.111 | 1.07  | 1.153 | <0.0001 |
| 12 | Autoimmune disease     | 0.0809  | 1.084 | 1.028 | 1.144 | 0.0031  |
| 13 | Physical limitation    | 0.0747  | 1.078 | 1.021 | 1.137 | 0.0063  |
| 14 |                        |         |       |       |       |         |

<sup>a</sup> Used to determine overall systemic health; each increase reflects a stepwise increase in cumulative mortality.

<sup>b</sup> A 13-point scale with 7 complication categories: retinopathy, nephropathy, neuropathy, cerebrovascular, cardiovascular, peripheral vascular disease, and metabolic. Each complication is given a numeric score ranging from 0 to 2 (0 = no abnormality, 1 = some abnormality, 2 = severe abnormality).

*Abbreviations:* ARB, angiotensin II receptor blocker; NSAID, non-steroidal anti-inflammatory drug; PPI, proton pump inhibitor.

**Supplemental Table A2—Subgroup analysis of risk of mortality among diabetic patients with HBV infection and matched control cohort**

| Characteristic                                         | Adjusted <sup>a</sup>    |                | Interaction<br><i>p</i> value |
|--------------------------------------------------------|--------------------------|----------------|-------------------------------|
|                                                        | Hazard ratio<br>(95% CI) | <i>p</i> value |                               |
| Sex                                                    |                          |                |                               |
| Male                                                   | 0.785 (0.754–0.817)      | <0.001         | 0.030                         |
| Female                                                 | 0.714 (0.667–0.765)      | <0.001         |                               |
| Age                                                    |                          |                |                               |
| 20–65 years                                            | 0.749 (0.719–0.781)      | <0.001         | 0.165                         |
| >65 years                                              | 0.770 (0.724–0.819)      | <0.001         |                               |
| Hypertension                                           |                          |                |                               |
| Yes                                                    | 0.870 (0.831–0.912)      | <0.001         | <0.001                        |
| No                                                     | 0.668 (0.635–0.703)      | <0.001         |                               |
| Coronary artery disease                                |                          |                |                               |
| Yes                                                    | 0.786 (0.735–0.840)      | <0.001         | 0.345                         |
| No                                                     | 0.759 (0.729–0.790)      | <0.001         |                               |
| Chronic kidney disease                                 |                          |                |                               |
| Yes                                                    | 0.818 (0.757–0.886)      | <0.001         | 0.114                         |
| No                                                     | 0.754 (0.726–0.784)      | <0.001         |                               |
| Dyslipidemia                                           |                          |                |                               |
| Yes                                                    | 0.936 (0.887–0.986)      | 0.014          | <0.001                        |
| No                                                     | 0.630 (0.602–0.659)      | <0.001         |                               |
| Use of insulin                                         |                          |                |                               |
| Yes                                                    | 0.932 (0.792–1.096)      | 0.395          | 0.020                         |
| No                                                     | 0.759 (0.733–0.786)      | <0.001         |                               |
| Adapted Diabetes Complications<br>Severity Index score |                          |                |                               |
| 0–1                                                    | 0.749 (0.719–0.780)      | <0.001         | 0.010                         |
| ≥2                                                     | 0.826 (0.774–0.881)      | <0.001         |                               |

<sup>a</sup> Adjusted for monthly income, urbanization level, Charlson Comorbidity Index score, dipeptidyl peptidase-4 inhibitor use, metformin use, sulfonylurea use, alpha blocker use, dyslipidemia, atrial fibrillation, peripheral vascular disease, and heart failure.

**Supplemental Table A3—Subgroup analysis of risk of MACE among diabetic patients with HBV infection and matched control cohort**

| Characteristic                                         | Adjusted <sup>a</sup>    |                | Interaction<br><i>p</i> value |
|--------------------------------------------------------|--------------------------|----------------|-------------------------------|
|                                                        | Hazard ratio<br>(95% CI) | <i>p</i> value |                               |
| Sex                                                    |                          |                |                               |
| Male                                                   | 0.526 (0.480–0.576)      | <0.001         | 0.002                         |
| Female                                                 | 0.686 (0.596–0.789)      | <0.001         |                               |
| Age                                                    |                          |                |                               |
| 20–65 years                                            | 0.579 (0.528–0.636)      | <0.001         | 0.799                         |
| >65 years                                              | 0.575 (0.502–0.659)      | <0.001         |                               |
| Hypertension                                           |                          |                |                               |
| Yes                                                    | 0.619 (0.563–0.680)      | <0.001         | 0.005                         |
| No                                                     | 0.493 (0.431–0.564)      | <0.001         |                               |
| Coronary artery disease                                |                          |                |                               |
| Yes                                                    | 0.670 (0.585–0.766)      | <0.001         | 0.005                         |
| No                                                     | 0.533 (0.486–0.585)      | <0.001         |                               |
| Chronic kidney disease                                 |                          |                |                               |
| Yes                                                    | 0.638 (0.536–0.760)      | <0.001         | 0.158                         |
| No                                                     | 0.558 (0.512–0.607)      | <0.001         |                               |
| Dyslipidemia                                           |                          |                |                               |
| Yes                                                    | 0.638 (0.576–0.707)      | <0.001         | 0.003                         |
| No                                                     | 0.501 (0.447–0.562)      | <0.001         |                               |
| Use of insulin                                         |                          |                |                               |
| Yes                                                    | 1.143 (0.734–1.781)      | 0.555          | 0.005                         |
| No                                                     | 0.560 (0.518–0.605)      | <0.001         |                               |
| Adapted Diabetes Complications<br>Severity Index score |                          |                |                               |
| 0–1                                                    | 0.545 (0.497–0.598)      | <0.001         | 0.044                         |
| ≥2                                                     | 0.640 (0.557–0.735)      | <0.001         |                               |

<sup>a</sup> Adjusted for monthly income, urbanization level, Charlson Comorbidity Index score, dipeptidyl peptidase-4 inhibitor use, metformin use, sulfonylurea use, alpha blocker use, dyslipidemia, atrial fibrillation, peripheral vascular disease, and heart failure.

1  
2  
3  
4  
5  
6  
7  
8  
9  
10  
11  
12  
13  
14  
15  
16  
17  
18  
19  
20  
21  
22  
23  
24  
25  
26  
27  
28  
29  
30  
31  
32  
33  
34  
35  
36  
37  
38  
39  
40  
41  
42  
43  
44  
45  
46  
47  
48  
49  
50  
51  
52  
53  
54  
55  
56  
57  
58  
59  
60

For peer review only

STROBE 2007 (v4) Statement—Checklist of items that should be included in reports of *case-control studies*

| Section/Topic             | Item # | Recommendation                                                                                                                                                                       | Reported on page # |
|---------------------------|--------|--------------------------------------------------------------------------------------------------------------------------------------------------------------------------------------|--------------------|
| Title and abstract        | 1      | (a) Indicate the study’s design with a commonly used term in the title or the abstract                                                                                               | Page 1             |
|                           |        | (b) Provide in the abstract an informative and balanced summary of what was done and what was found                                                                                  | Page 4             |
| <b>Introduction</b>       |        |                                                                                                                                                                                      |                    |
| Background/rationale      | 2      | Explain the scientific background and rationale for the investigation being reported                                                                                                 | Page 7             |
| Objectives                | 3      | State specific objectives, including any prespecified hypotheses                                                                                                                     | Page 8             |
| <b>Methods</b>            |        |                                                                                                                                                                                      |                    |
| Study design              | 4      | Present key elements of study design early in the paper                                                                                                                              | Page 10            |
| Setting                   | 5      | Describe the setting, locations, and relevant dates, including periods of recruitment, exposure, follow-up, and data collection                                                      | Page 9 and 10      |
| Participants              | 6      | (a) Give the eligibility criteria, and the sources and methods of case ascertainment and control selection. Give the rationale for the choice of cases and controls                  | Page 10            |
|                           |        | (b) For matched studies, give matching criteria and the number of controls per case                                                                                                  | Page 10            |
| Variables                 | 7      | Clearly define all outcomes, exposures, predictors, potential confounders, and effect modifiers. Give diagnostic criteria, if applicable                                             | Page 11            |
| Data sources/ measurement | 8*     | For each variable of interest, give sources of data and details of methods of assessment (measurement). Describe comparability of assessment methods if there is more than one group | Page 8             |
| Bias                      | 9      | Describe any efforts to address potential sources of bias                                                                                                                            | Page 11, 12, 13    |
| Study size                | 10     | Explain how the study size was arrived at                                                                                                                                            | Page 10            |
| Quantitative variables    | 11     | Explain how quantitative variables were handled in the analyses. If applicable, describe which groupings were chosen and why                                                         | Page 11            |
| Statistical methods       | 12     | (a) Describe all statistical methods, including those used to control for confounding                                                                                                | Page 11, 12, 13    |
|                           |        | (b) Describe any methods used to examine subgroups and interactions                                                                                                                  | Page 12, 13        |
|                           |        | (c) Explain how missing data were addressed                                                                                                                                          | Page 12, 13        |
|                           |        | (d) If applicable, explain how matching of cases and controls was addressed                                                                                                          | Page 12, 13        |
|                           |        | (e) Describe any sensitivity analyses                                                                                                                                                | Page 12, 13        |
| <b>Results</b>            |        |                                                                                                                                                                                      |                    |

1  
2  
3  
4  
5  
6  
7  
8  
9  
10  
11  
12  
13  
14  
15  
16  
17  
18  
19  
20  
21  
22  
23  
24  
25  
26  
27  
28  
29  
30  
31  
32  
33  
34  
35  
36  
37  
38  
39  
40  
41  
42  
43  
44  
45  
46  
47  
48  
49

|                          |     |                                                                                                                                                                                                              |                                |
|--------------------------|-----|--------------------------------------------------------------------------------------------------------------------------------------------------------------------------------------------------------------|--------------------------------|
| Participants             | 13* | (a) Report numbers of individuals at each stage of study—eg numbers potentially eligible, examined for eligibility, confirmed eligible, included in the study, completing follow-up, and analysed            | Page 13                        |
|                          |     | (b) Give reasons for non-participation at each stage                                                                                                                                                         | Page 13                        |
|                          |     | (c) Consider use of a flow diagram                                                                                                                                                                           | Page 13, Figure1               |
| Descriptive data         | 14* | (a) Give characteristics of study participants (eg demographic, clinical, social) and information on exposures and potential confounders                                                                     | Page 13, Table 1               |
|                          |     | (b) Indicate number of participants with missing data for each variable of interest                                                                                                                          | Hard endpoint, no missing data |
| Outcome data             | 15* | Report numbers in each exposure category, or summary measures of exposure                                                                                                                                    | Page 14, 15                    |
| Main results             | 16  | (a) Give unadjusted estimates and, if applicable, confounder-adjusted estimates and their precision (eg, 95% confidence interval). Make clear which confounders were adjusted for and why they were included | Page 14, 15                    |
|                          |     | (b) Report category boundaries when continuous variables were categorized                                                                                                                                    | NA                             |
|                          |     | (c) If relevant, consider translating estimates of relative risk into absolute risk for a meaningful time period                                                                                             | Page 14, Table 2               |
| Other analyses           | 17  | Report other analyses done—eg analyses of subgroups and interactions, and sensitivity analyses                                                                                                               | Page 14, 15                    |
| <b>Discussion</b>        |     |                                                                                                                                                                                                              |                                |
| Key results              | 18  | Summarise key results with reference to study objectives                                                                                                                                                     | Page 15,16                     |
| Limitations              | 19  | Discuss limitations of the study, taking into account sources of potential bias or imprecision.<br>Discuss both direction and magnitude of any potential bias                                                | Page 19                        |
| Interpretation           | 20  | Give a cautious overall interpretation of results considering objectives, limitations, multiplicity of analyses, results from similar studies, and other relevant evidence                                   | Page 20                        |
| Generalisability         | 21  | Discuss the generalisability (external validity) of the study results                                                                                                                                        | Page 18                        |
| <b>Other information</b> |     |                                                                                                                                                                                                              | Page 19,20                     |
| Funding                  | 22  | Give the source of funding and the role of the funders for the present study and, if applicable, for the original study on which the present article is based                                                | Page 20                        |

\*Give information separately for cases and controls in case-control studies and, if applicable, for exposed and unexposed groups in cohort and cross-sectional studies.

**Note:** An Explanation and Elaboration article discusses each checklist item and gives methodological background and published examples of transparent reporting. The STROBE checklist is best used in conjunction with this article (freely available on the Web sites of PLoS Medicine at <http://www.plosmedicine.org/>, Annals of Internal Medicine at <http://www.annals.org/>, and Epidemiology at <http://www.epidem.com/>). Information on the STROBE Initiative is available at [www.strobe-statement.org](http://www.strobe-statement.org).

# BMJ Open

## The impact of chronic hepatitis B infection on major adverse cardiovascular events and all-cause mortality in diabetic patients: a nationwide population-based study from Taiwan

|                                 |                                                                                                                                                                                                                                                                                                                                                                                                                                                                                                                                                                                                                                                                                                                                                                                                                                                                                                                                                                    |
|---------------------------------|--------------------------------------------------------------------------------------------------------------------------------------------------------------------------------------------------------------------------------------------------------------------------------------------------------------------------------------------------------------------------------------------------------------------------------------------------------------------------------------------------------------------------------------------------------------------------------------------------------------------------------------------------------------------------------------------------------------------------------------------------------------------------------------------------------------------------------------------------------------------------------------------------------------------------------------------------------------------|
| Journal:                        | <i>BMJ Open</i>                                                                                                                                                                                                                                                                                                                                                                                                                                                                                                                                                                                                                                                                                                                                                                                                                                                                                                                                                    |
| Manuscript ID                   | bmjopen-2017-016179.R1                                                                                                                                                                                                                                                                                                                                                                                                                                                                                                                                                                                                                                                                                                                                                                                                                                                                                                                                             |
| Article Type:                   | Research                                                                                                                                                                                                                                                                                                                                                                                                                                                                                                                                                                                                                                                                                                                                                                                                                                                                                                                                                           |
| Date Submitted by the Author:   | 13-Jun-2017                                                                                                                                                                                                                                                                                                                                                                                                                                                                                                                                                                                                                                                                                                                                                                                                                                                                                                                                                        |
| Complete List of Authors:       | Kuo, Chin-Sung; Taipei Veterans General Hospital, Division of Endocrinology and Metabolism<br>Chen, Yung-Tai; Taipei City Hospital Heping Fuyou Branch, Department of Medicine<br>Hsu, Chien-Yi; Taipei Medical University Hospital, Division of Cardiology, Department of Medicine<br>Chang, Chun-Chin; Taipei Veterans General Hospital, Division of Cardiology, Department of Medicine<br>Chou, Ruey-Hsing; Taipei Veterans General Hospital, Division of Cardiology, Department of Medicine<br>Li, Szu-Yuan; Taipei Veterans General Hospital, Divisions of Nephrology<br>Kuo, Shu-Chen; National Health Research Institutes, National Institute of Infectious Diseases and Vaccinology<br>Huang, Po-Hsun; Division of Cardiology, Department of Medicine, Taipei Veterans General Hospital, ;<br>Chen, Jaw-Wen; Taipei Veterans General Hospital, Department of Medical Research<br>Lin, Shing-Jong; Taipei Veterans general Hospital, Division of Cardiology |
| <b>Primary Subject Heading</b>: | Epidemiology                                                                                                                                                                                                                                                                                                                                                                                                                                                                                                                                                                                                                                                                                                                                                                                                                                                                                                                                                       |
| Secondary Subject Heading:      | Cardiovascular medicine, Diabetes and endocrinology, Gastroenterology and hepatology                                                                                                                                                                                                                                                                                                                                                                                                                                                                                                                                                                                                                                                                                                                                                                                                                                                                               |
| Keywords:                       | Myocardial infarction < CARDIOLOGY, Stroke < NEUROLOGY, Diabetes & endocrinology < INTERNAL MEDICINE, Hepatology < INTERNAL MEDICINE                                                                                                                                                                                                                                                                                                                                                                                                                                                                                                                                                                                                                                                                                                                                                                                                                               |
|                                 |                                                                                                                                                                                                                                                                                                                                                                                                                                                                                                                                                                                                                                                                                                                                                                                                                                                                                                                                                                    |

SCHOLARONE™  
Manuscripts

1  
2  
3  
4 **The impact of chronic hepatitis B infection on major adverse cardiovascular**  
5  
6 **events and all-cause mortality in diabetic patients: a nationwide**  
7  
8 **population-based study from Taiwan**  
9  
10

11  
12  
13  
14  
15 Chin-Sung Kuo M.D.<sup>1,9‡</sup>; Yung-Tai Chen M.D.<sup>6,9‡</sup>; Chien-Yi Hsu M.D.<sup>7,9,12,14</sup>; Chun-Chin  
16  
17 Chang M.D.<sup>2,9</sup>; Ruey-Hsing Chou M.D.<sup>2,9</sup>; Szu-Yuan Li M.D.<sup>3,9</sup>; Shu-Chen Kuo M.D.<sup>4,11</sup>;  
18  
19 \*Po-Hsun Huang M.D. Ph.D.<sup>2,7,9</sup>; Jaw-Wen Chen M.D.<sup>2,5,7,8</sup>; \*Shing-Jong Lin M.D.  
20  
21 Ph.D.<sup>2,5,7,9,13</sup>  
22  
23  
24  
25  
26  
27  
28  
29

30 <sup>1</sup>Division of Endocrinology and Metabolism; <sup>2</sup>Division of Cardiology; <sup>3</sup>Division of  
31  
32 Nephrology; <sup>4</sup>Division of Infectious Diseases, Department of Medicine; <sup>5</sup>Department of  
33  
34 Medical Research, Taipei Veterans General Hospital, Taipei, Taiwan; <sup>6</sup>Department of  
35  
36 Medicine, Taipei City Hospital Heping Fuyou Branch, Taipei, Taiwan; <sup>7</sup>Cardiovascular  
37  
38 Research Center; <sup>8</sup>Institute of Pharmacology; <sup>9</sup>Institute of Clinical Medicine, National  
39  
40 Yang-Ming University, Taipei, Taiwan; <sup>10</sup>Department of Medicine, Yuli branch, Taipei  
41  
42 Veterans General Hospital, Hualien, Taiwan; <sup>11</sup>National Institute of Infectious Diseases  
43  
44 and Vaccinology, National Health Research Institutes, Miaoli County, Taiwan;  
45  
46  
47  
48  
49  
50  
51  
52  
53 <sup>12</sup>Department of Internal Medicine, School of Medicine, <sup>13</sup>Taipei Medical University,  
54  
55 Taipei, Taiwan; <sup>14</sup>Division of Cardiology and Cardiovascular Research Center,  
56  
57  
58  
59  
60



1  
2  
3  
4 Department of Internal Medicine, Taipei Medical University Hospital, Taipei, Taiwan.  
5  
6  
7  
8  
9  
10

11  
12 **Running title:** Chronic hepatitis B infection in diabetic patients  
13  
14  
15  
16  
17  
18  
19  
20

21 **‡These authors contributed equally and share the first authorship**  
22  
23  
24  
25  
26  
27

28 **\*Address correspondence to:**  
29

30 Dr. Po-Hsun Huang and Dr. Shing-Jong Lin  
31

32 Division of Cardiology, Department of Medicine,  
33  
34

35 Taipei Veterans General Hospital  
36  
37

38 No. 201, Sec. 2, Shih-Pai Road, Taipei, Taiwan (R.O.C.)  
39  
40

41 Tel: 886-2-2871-2121 ext. 7511  
42  
43

44 Fax: 886-2-2875-7735.  
45  
46

47 **E-mail:** [huangbsvgh@gmail.com](mailto:huangbsvgh@gmail.com) and [sjlin@vghtpe.gov.tw](mailto:sjlin@vghtpe.gov.tw)  
48  
49  
50  
51  
52

53 Word counts: 3128  
54

55 Number of tables: 2  
56  
57  
58  
59  
60

1  
2  
3  
4  
5  
6  
7  
8  
9  
10  
11  
12  
13  
14  
15  
16  
17  
18  
19  
20  
21  
22  
23  
24  
25  
26  
27  
28  
29  
30  
31  
32  
33  
34  
35  
36  
37  
38  
39  
40  
41  
42  
43  
44  
45  
46  
47  
48  
49  
50  
51  
52  
53  
54  
55  
56  
57  
58  
59  
60

Number of figures: 3

Number of supplementary tables: 3

For peer review only

## ABSTRACT

**Objectives** The association between hepatitis B virus (HBV) infection and cardiovascular disease remains uncertain. This study explored long-term hard endpoints (i.e., myocardial infarction, ischemic stroke) and all-cause mortality in diabetic patients with chronic HBV infection in Taiwan from 2000 to 2013.

**Design** This study was retrospective, longitudinal and propensity score-matched.

**Setting** Nationwide claims data for the period 2000–2013 were retrieved from Taiwan's National Health Insurance Research Database.

**Participants** The study included 40,162 diabetic patients with chronic HBV infection (HBV cohort) and 40,162 propensity score-matched diabetic patients without HBV infection (control cohort). Chronic HBV infection was identified based on three or more outpatient clinic visits or one hospital admission with a diagnosis of HBV infection.

**Main outcome measures** Primary outcomes were major adverse cardiovascular events (MACE, including myocardial infarction and ischemic stroke), heart failure, and all-cause mortality.

**Results** During the median follow-up period of  $5.3 \pm 3.4$  years, the HBV cohort had significantly lower risks of myocardial infarction (adjusted hazard ratio [aHR] = 0.49; 95% confidence interval [CI], 0.42–0.56), ischemic stroke (aHR = 0.61; 95% CI, 0.56–0.67), heart failure (aHR = 0.50; 95% CI, 0.43–0.59), and all-cause mortality (aHR =

1  
2  
3  
4 0.72; 95% CI, 0.70–0.75) compared with the control cohort. The impact of HBV infection  
5  
6  
7 on the sequential risk of MACE was greater in patients with fewer diabetic  
8  
9 complications.  
10

11  
12 **Conclusions** Chronic HBV infection was associated with decreased risk of MACE,  
13  
14 heart failure and all-cause mortality in diabetic patients. Further research is needed to  
15  
16 investigate the mechanism underlying these findings.  
17  
18  
19

20  
21  
22  
23  
24 **Key words:** atherosclerosis, diabetes, hepatitis B virus, ischemic stroke, myocardial  
25  
26  
27 infarction  
28  
29  
30  
31  
32  
33  
34  
35  
36  
37  
38  
39  
40  
41  
42  
43  
44  
45  
46  
47  
48  
49  
50  
51  
52  
53  
54  
55  
56  
57  
58  
59  
60

### Strengths and limitations of this study

- An unselected nationwide population with the most extensive sample of diabetic patients with chronic HBV infection available was examined, minimising the possibility of referral bias
- This study is the largest-scale examination of a diabetic HBV cohort to date.
- No previous study has explored long-term hard endpoints (i.e. myocardial infarction, ischemic stroke) and all-cause mortality in diabetic patients with chronic HBV infection.
- Liver function test results and glycated haemoglobin values were not available in the nationwide dataset.
- Some personal information, including body mass index and smoking status, was not available in the administrative dataset.

## INTRODUCTION

The global incidence of diabetes mellitus is increasing, and the number of diabetic patients is expected to reach 366 million by 2030.<sup>1</sup> Atherosclerotic cardiovascular disease is the leading cause of morbidity and mortality among individuals with diabetes, and the largest contributor to the direct and indirect economic costs of diabetes.<sup>2</sup> Diabetes and commonly co-existing conditions (e.g. hypertension and dyslipidaemia) are well-known risk factors for cardiovascular complications.<sup>3</sup> Diabetes is also the leading cause of chronic kidney disease (CKD) and end-stage renal disease.<sup>4</sup> Convincing evidence has shown that an inter-relationship between chronic inflammation and metabolic abnormalities in diabetes leads to endothelial dysfunction and vascular complications.<sup>5</sup>

Hepatitis B virus (HBV) infection has a high prevalence and is a major public health problem in Taiwan and other countries worldwide.<sup>6,7</sup> Chronic HBV infection may cause chronic hepatitis, cirrhosis, hepatic decompensation, and hepatocellular carcinoma (HCC).<sup>8</sup> Chronic HBV infection is an inflammatory condition. Other diseases with chronic low-grade inflammation have been shown to increase the risk of major adverse cardiovascular events (MACE).<sup>9</sup> Nevertheless, chronic HBV infection has been reported to be associated inversely with metabolic syndrome in the United States, based on the Third National Health and Nutrition Examination Survey (NHANES III),<sup>10</sup> as well as in a

1  
2  
3  
4 population-based study in Taiwan.<sup>11</sup> The association between HBV infection and MACE,  
5  
6  
7 however, remains uncertain. Previous cross-sectional studies of this association have  
8  
9  
10 produced conflicting results.<sup>12-14</sup> A Korean cohort study postulated that hepatitis B  
11  
12 surface antigen (HBsAg) seropositivity was associated with decreased risks of ischemic  
13  
14 stroke and myocardial infarction, as well as an increased risk of haemorrhagic stroke.<sup>15</sup>  
15  
16  
17 A population-based prospective study conducted in Taiwan showed that HBsAg  
18  
19 seropositivity was not associated with enhanced cardiovascular mortality during a  
20  
21 17-year follow-up period.<sup>16</sup> No study to date has examined the relationship between  
22  
23  
24 chronic HBV infection and MACE or all-cause mortality in diabetic patients.  
25  
26  
27

28  
29  
30 Accordingly, we conducted a nationwide longitudinal cohort study to investigate the  
31  
32 relationship between chronic HBV infection and MACE, as well as all-cause mortality, in  
33  
34 diabetic patients in Taiwan, which is one of the most hyperendemic areas for HBV  
35  
36 infection in the world.<sup>17</sup> To our knowledge, this study is the largest-scale examination of  
37  
38  
39 a diabetic HBV cohort.  
40  
41  
42  
43  
44

## 45 46 **METHODS**

### 47 48 **Data sources**

49  
50  
51 Data were extracted from the Taiwan National Health Insurance Research Database  
52  
53  
54 (NHIRD), which contains anonymised secondary data that are available for research  
55  
56  
57  
58  
59  
60

1  
2  
3  
4 purposes. Taiwan's National Health Insurance (NHI) programme, launched in 1995,  
5  
6  
7 currently covers 99% of the population of 23 million people. The database comprises all  
8  
9  
10 registry and claims data from the NHI system, ranging from demographic data to  
11  
12  
13 detailed orders for ambulatory and inpatient care. Taiwan's NHI Bureau is responsible  
14  
15  
16 for auditing medical payments through a comprehensive review of medical records,  
17  
18  
19 examination reports, and results of imaging studies. If a physician fails to meet the  
20  
21  
22 standards for clinical practice, Taiwan's NHI reserves the right to reject payment and  
23  
24  
25 may impose substantial financial penalties. Disease diagnoses are coded according to  
26  
27  
28 the International Classification of Disease, Ninth Revision, Clinical Modification  
29  
30  
31 (ICD-9-CM). The diagnostic accuracy for major diseases of codes registered in the  
32  
33  
34 NHIRD has been validated thoroughly.<sup>18-21</sup> In the present study, we used the  
35  
36  
37 Longitudinal Cohort of Diabetes Patients dataset, sourced directly from the NHIRD. This  
38  
39  
40 dataset includes all available medical registry data from a random sample of 120,000  
41  
42  
43 patients diagnosed with diabetes mellitus for each year since 1999. The study was  
44  
45  
46 exempted from full review by the Institutional Review Board of Taipei City Hospital  
47  
48  
49 (TCHIRB-1030603-W) because the dataset comprised de-identified secondary data.  
50  
51  
52

### 53 **Study Design**

54  
55  
56 This nationwide, population-based, observational, retrospective cohort study was  
57  
58  
59  
60



1  
2  
3  
4 conducted to determine the association between chronic HBV infection and sequential  
5  
6  
7 MACE in diabetic patients. Two cohorts were enrolled in the study: the HBV cohort and  
8  
9  
10 a matched control cohort. The HBV cohort consisted of patients diagnosed with chronic  
11  
12  
13 HBV infection, defined based on three or more outpatient clinic visits with ICD-9-CM  
14  
15  
16 codes 070.2, 070.3, and/or V02.61, or admission with a diagnosis of chronic HBV  
17  
18  
19 infection between 1 January 2000 and 31 December 2012.<sup>22</sup> The index date was  
20  
21  
22 defined as the first day of chronic HBV infection diagnosis. Patients with the following  
23  
24  
25 characteristics were excluded: age < 20 years, diagnosis with hepatitis C infection,  
26  
27  
28 fewer than three outpatient clinic visits for HBV infection, history of myocardial infarction,  
29  
30  
31 and history of cerebrovascular disease. The control cohort comprised all patients with  
32  
33  
34 no diagnosis of HBV infection in the Longitudinal Cohort of Diabetes Patients dataset.  
35  
36  
37 The exclusion criteria for the HBV cohort were also applied to the control cohort. Index  
38  
39  
40 dates for subjects in the control cohort were assigned randomly and corresponded to  
41  
42  
43 those of patients in the HBV cohort.

44  
45  
46 We used 1:1 propensity score matching and calculated propensity scores for the  
47  
48  
49 likelihood of diagnosis of chronic HBV infection using baseline covariates and  
50  
51  
52 multivariate logistic regression analysis (Supplemental Table A1). We matched one  
53  
54  
55 control patient with each patient in the HBV cohort with a similar propensity score based  
56  
57  
58 on nearest-neighbour matching without replacement, using callipers of a width equal to  
59  
60

0.1 standard deviation of the logit of the propensity score.

### Primary outcome measures

The primary outcomes were hospitalisation for myocardial infarction (ICD-9-CM code 410.x), ischemic stroke (ICD-9-CM codes 433.x, 434.x), or heart failure (ICD-9-CM code 428.x); and all-cause mortality. The MACE outcome was defined as a composite of myocardial infarction and ischemic stroke. Previous studies have validated the accuracy of myocardial infarction and ischemic stroke diagnoses in the NHIRD.<sup>21,23</sup> We also chose the occurrence of HCC as a positive control outcome and hospitalisation for appendicitis as a negative control outcome. To identify patients diagnosed with HCC, we used data from Taiwan's Catastrophic Illness Registry, which requires pathohistological confirmation of cancer diagnoses. Both cohorts were followed until death or the end of the study period (31 December 2013).

### Baseline Characteristics

Data on baseline demographic characteristics, including age, sex, monthly income (in New Taiwan Dollars [NT\$]: <NT\$19,100, NT\$19,100–\$41,999, and ≥NT\$42,000), level of urbanisation, and Charlson Comorbidity Index score, were collected. Taiwan's National Health Research Institute has defined four urbanisation levels for Taiwan. The

1  
2  
3  
4 most urbanised areas are designated as level 1, and the least urbanised areas are  
5  
6  
7 designated as level 4. The Charlson Comorbidity Index score reflects overall systemic  
8  
9  
10 health, with each increase in number reflecting a stepwise increase in cumulative  
11  
12 mortality.<sup>24</sup> We also identified use of medications that could confound the relationship  
13  
14  
15 between chronic HBV infection and the primary outcomes.  
16  
17

### 21 **Statistical analysis**

22  
23  
24 Descriptive statistics were used to characterise the baseline data from the study cohorts.  
25  
26  
27 Baseline characteristics of the two groups were compared using standardised mean  
28  
29  
30 differences. Propensity scores of the likelihood of diagnosis of chronic HBV infection  
31  
32  
33 were determined by multivariate logistic regression analysis, conditional on baseline  
34  
35  
36 covariates (Supplemental Table A1). The incidence rates of outcomes of interest in the  
37  
38  
39 two groups were calculated using Poisson distributions. The cumulative incidence or  
40  
41  
42 risk of outcomes was estimated using the Kaplan–Meier method, and differences  
43  
44  
45 between cohorts were evaluated with the log-rank test. Cox regression models with a  
46  
47  
48 conditional approach and stratification were used to calculate hazard ratios (HRs) and  
49  
50  
51 95% confidence intervals (CIs) for the risks of outcomes.<sup>25</sup> Cox regression with  
52  
53  
54 adjustment for significant differences in covariates between groups was used to  
55  
56  
57 calculate adjusted hazard ratios (aHRs). Finally, the likelihood ratio test was used to  
58  
59  
60

1  
2  
3  
4 examine interactions between the occurrence of outcomes subsequent to chronic HBV  
5  
6  
7 infection and the following variables: age, sex, hypertension, coronary artery disease,  
8  
9  
10 CKD, dyslipidaemia, use of insulin, and adapted Diabetes Complications Severity Index  
11  
12  
13 score. Subgroup analyses were also performed accordingly.

14  
15 The SQL Server 2012 (Microsoft Corporation, Redmond, WA, USA) was used for  
16  
17  
18 data linkage, processing, and sampling. Propensity scores were calculated with SAS  
19  
20  
21 version 9.3 (SAS Institute, Cary, NC, USA). All other statistical analyses were  
22  
23  
24 conducted using STATA statistical software (version 12.0; StataCorp, College Station,  
25  
26  
27 TX, USA). *P* values < 0.05 were considered to be statistically significant.  
28  
29  
30  
31

## 32 **RESULTS**

### 33 **Patient characteristics**

34  
35  
36  
37 The study cohort consisted of 40,162 diabetic patients with chronic HBV infection and  
38  
39  
40 40,162 matched control subjects without HBV infection (Figure 1). The mean age was  
41  
42  
43 52.7 (standard deviations, 11.6 [HBV] and 11.5 [control]) years, and 62.7% of subjects  
44  
45  
46 were male (Table 1). The prevalence of comorbidities, such as cardiovascular risk  
47  
48  
49 factors, and concomitant medication use was similar in the HBV and control groups.  
50  
51  
52  
53  
54

### 55 **HBV infection, risk of cardiovascular disease, and all-cause mortality in diabetic**

## patients

During the mean 5.3-year follow-up period, the incidence rates of all-cause mortality, myocardial infarction, ischemic stroke, and heart failure were 26.96, 1.38, 3.71, and 1.12 per 10<sup>3</sup> person-years, respectively, in the HBV cohort and 35.29, 2.76, 5.88, and 2.01 per 10<sup>3</sup> person-years, respectively, in the matched control cohort (Table 2). Compared with the matched control cohort, the HBV cohort had significantly reduced risks of all-cause mortality (aHR = 0.72; 95% CI, 0.70–0.75;  $p < 0.001$ ), myocardial infarction (aHR = 0.49; 95% CI, 0.42–0.56;  $p < 0.001$ ), ischemic stroke (aHR = 0.61; 95% CI, 0.56–0.67;  $p < 0.001$ ), MACE (aHR = 0.58; 95% CI, 0.53–0.62;  $p < 0.001$ ), and heart failure (aHR = 0.50; 95% CI, 0.43–0.59;  $p < 0.001$ ; Table 2). The cumulative incidences of all-cause mortality and MACE in both groups are illustrated in Figure 2. The HBV cohort had a significantly higher risk of HCC (aHR = 7.47; 95% CI, 6.53–8.56;  $p < 0.001$ ) and a similar risk of hospitalisation for appendicitis (aHR = 1.13; 95% CI, 0.93–1.38;  $p = 0.227$ ).

An interaction test for all-cause mortality showed significant correlations between HBV infection and sex ( $p = 0.030$ ), hypertension ( $p < 0.001$ ), dyslipidaemia ( $p < 0.001$ ), use of insulin ( $p = 0.020$ ), and adapted Diabetes Complications Severity Index score ( $p = 0.010$ ; Supplemental Table A2). An interaction test for MACE showed significant correlations between HBV infection and sex ( $p = 0.002$ ), hypertension ( $p = 0.005$ ),

1  
2  
3  
4 coronary artery disease ( $p = 0.005$ ), dyslipidaemia ( $p = 0.003$ ), use of insulin ( $p = 0.005$ ),  
5  
6  
7 and adapted Diabetes Complications Severity Index score ( $p = 0.04$ ; Supplemental  
8  
9  
10 Table A3). Figure 3 shows the results of multivariable stratified subgroup analyses. The  
11  
12 effects of chronic HBV infection on all-cause mortality and MACE were greater in  
13  
14 patients without hypertension and dyslipidaemia than in matched controls. The  
15  
16 association between chronic HBV infection and all-cause mortality or sequential MACE  
17  
18 was also greater in patients who were not using insulin. In stratified analyses, the effect  
19  
20 of chronic HBV infection on the sequential risk of MACE was greater in patients with low  
21  
22 (<2) adapted Diabetes Complications Severity Index scores (Supplemental Tables A2  
23  
24 and A3).  
25  
26  
27  
28  
29  
30  
31  
32  
33  
34  
35  
36

## 37 DISCUSSION

38  
39  
40 To our knowledge, this propensity score-matched, nationwide, population-based study  
41  
42 is the first to elucidate the correlation of chronic HBV infection with lower risks of MACE  
43  
44 and heart failure in diabetic patients. In addition, we found a significantly decreased risk  
45  
46 of all-cause mortality in diabetic patients with chronic HBV infection during the mean  
47  
48 5.3-year follow-up period. The impact of HBV infection on the sequential risk of MACE  
49  
50 was greater in patients with fewer diabetic complications.  
51  
52  
53  
54  
55  
56  
57  
58  
59  
60

1  
2  
3  
4 This study has several strengths. First, it involved an unselected nationwide  
5  
6 population with the most extensive sample of diabetic patients with chronic HBV  
7  
8 infection available, minimising the possibility of referral bias. Second, the diabetic  
9  
10 HBV cohort comprised 40,162 patients during the 12-year study period, providing  
11  
12 adequate statistical power for analysis of the risks of MACE, heart failure, and  
13  
14 all-cause mortality (all hard endpoints) in this population. To our knowledge, this  
15  
16 study is the largest-scale examination of a diabetic HBV cohort to date. In addition,  
17  
18 we compared study subjects with propensity score–matched control subjects, instead  
19  
20 of conducting age- and sex-adjusted analyses in comparison with a general  
21  
22 population. Competing risks are the rule in clinical epidemiological studies.<sup>26</sup> Use of  
23  
24 the Kaplan–Meier method may lead to overestimation of the event (MACE) risk in the  
25  
26 presence of the competing risk (death).<sup>26</sup> However, we found reduced risks of MACE  
27  
28 and all-cause mortality in the diabetic HBV cohort. These results would remain robust  
29  
30 in the presence of competing risks. Furthermore, the risks of all-cause mortality and  
31  
32 MACE in our study were comparable with the previously published data.<sup>27,28</sup>  
33  
34  
35  
36  
37  
38  
39  
40  
41  
42  
43  
44  
45  
46

47 Some limitations of our study should be noted. First, absolute values from liver  
48  
49 function tests were not available in the nationwide dataset. An individual with chronic  
50  
51 HBV infection may present as a ‘healthy’ carrier with normal liver function or with  
52  
53 chronic hepatitis. Second, data on glycated haemoglobin concentration, used widely as  
54  
55  
56  
57  
58  
59  
60

1  
2  
3  
4 a glycaemic control index, were not available in this dataset. Glycaemic control may be  
5  
6  
7 a confounding factor for MACE. However, recent reports have suggested that reduction  
8  
9  
10 of the blood glucose level has no beneficial effect or only modest effects on diabetic  
11  
12 cardiovascular complications in high-risk populations.<sup>29,30</sup> In addition, the emergence of  
13  
14 MACE caused by poor glycaemic control is a lengthy process.<sup>29</sup> Third, some personal  
15  
16 information, including body mass index and smoking status, was not available in the  
17  
18 administrative dataset, preventing accurate assessment of the contributory and  
19  
20 confounding effects of these factors. The effects of chronic HBV infection on MACE  
21  
22 may be due to residual confounding. However, we performed a sensitivity analysis that  
23  
24 included positive and negative control outcomes to provide further support for our  
25  
26 findings.<sup>31</sup> Fourth, this observational study provided clinically relevant risk estimates  
27  
28 without speculating on causation.  
29  
30  
31  
32  
33  
34  
35  
36  
37

38  
39 Cross-sectional studies conducted as part of the NHANES III<sup>10</sup> and in Taiwan<sup>11</sup> have  
40  
41 documented an inverse association between metabolic syndrome and chronic HBV,  
42  
43 supporting our findings. A recent systemic review revealed that many, but not all,  
44  
45 relevant studies have shown that patients with chronic HBV infection have lower risks of  
46  
47 metabolic syndrome, non-alcoholic fatty liver disease, and dyslipidaemia.<sup>32</sup> A study of a  
48  
49 non-diabetic Korean cohort showed that HBsAg seropositivity was associated with  
50  
51 decreased risks of ischemic stroke and myocardial infarction, secondary to  
52  
53  
54  
55  
56  
57  
58  
59  
60



1  
2  
3  
4 HBV-associated liver dysfunction.<sup>15</sup> Other reported mechanisms potentially linking  
5  
6  
7 chronic HBV infection to a decreased risk of MACE include lower levels of clotting  
8  
9  
10 factors II and VII and fibrinogen among HBsAg-positive (vs. -negative) individuals, as  
11  
12 found in blood donors in Gambia and London.<sup>33</sup>  
13

14  
15 A cohort study from England and Wales showed no significantly increased risk of  
16  
17 all-cause mortality in transfusion donors with HBV infection compared with donors  
18  
19 without HBV infection.<sup>34</sup> In that study, the standardised mortality rate for circulatory  
20  
21 disease was significantly lower in both males and females with hepatitis B.<sup>34</sup> These  
22  
23 results may support our findings. Furthermore, the risk of circulatory disease-related  
24  
25 death in our HBV cohort was significantly lower than in an Australian study,<sup>35</sup>  
26  
27 comparable to that reported in another Taiwanese study,<sup>16</sup> and significantly higher than  
28  
29 that found in a study conducted in China.<sup>36</sup> The Chinese study examined the period  
30  
31 1992–2002 and the HBV cohort had very low cardiovascular mortality rates (20.6 and  
32  
33 16.4 per 100,000 person-years in males and females, respectively).<sup>36</sup> The study  
34  
35 conducted in Taiwan showed that HBsAg seropositivity was not associated with  
36  
37 atherosclerosis-related mortality risk in a general population.<sup>16</sup> One possible  
38  
39 explanation for this result is the lack of statistical power (HR = 0.84; 95% CI, 0.72–1.06)  
40  
41 due to the small sample (480 cases of death from atherosclerotic disease).<sup>16</sup> Results of  
42  
43 Australian and British studies are in agreement with our findings regarding the  
44  
45  
46  
47  
48  
49  
50  
51  
52  
53  
54  
55  
56  
57  
58  
59  
60

1  
2  
3  
4 relationship between HBV and MACE .<sup>34 35</sup>  
5  
6

7 Moreover, previous cohort studies have shown that the increased risk of all-cause  
8 mortality can be attributed mostly to excesses of liver-related deaths in general  
9 population s.<sup>16 35 36</sup> In the Australian study, the risk of death was increased 1.4 times in  
10 subjects with HBV infection;<sup>35</sup> this risk was increased 1.7 times in Taiwan<sup>16</sup> and  
11 three-fold in China.<sup>36</sup> We are not aware of any study that has examined the  
12 relationship between all-cause mortality and chronic HBV infection in diabetic patients.  
13  
14 We conducted this HBV study in a population with a very high risk of MACE. In our  
15 diabetic cohort, the incidence rate of MACE was high (498 vs. 839 per 100000  
16 person-years) to provide sufficient endpoints (1098 vs. 1663 events). Our study  
17 demonstrated a reduced all-cause mortality risk in diabetic subjects with chronic HBV  
18 infection. This finding may be explained by the decreased MACE risk in our diabetic  
19 HBV cohort. Diabetes, which is considered to be a coronary artery disease equivalent,  
20 is an important risk factor for cardiovascular disease.<sup>37</sup> Cardiovascular complication is  
21 the leading cause of mortality in diabetic patients.<sup>3</sup> Thus, the impact of HBV infection on  
22 all-cause mortality could plausibly be hypothesised to be greater in diabetic patients  
23 than in the general population.  
24  
25  
26  
27  
28  
29  
30  
31  
32  
33  
34  
35  
36  
37  
38  
39  
40  
41  
42  
43  
44  
45  
46  
47  
48  
49  
50  
51

## 52 53 54 55 56 **CONCLUSION** 57

1  
2  
3  
4 In this nationwide, longitudinal, propensity score–matched analysis, chronic HBV  
5  
6  
7 infection was associated with decreased risks of MACE, heart failure and all-cause  
8  
9  
10 mortality in diabetic patients. These findings may provide new insight into the  
11  
12 pathogenesis of diabetes and future therapeutic strategies. However, further research is  
13  
14  
15 need to confirm our findings and to explore the underlying mechanism.  
16  
17  
18  
19  
20  
21  
22  
23

24 **Contributors:** YTC, the guarantor of this work, had full access to all study data and  
25  
26 takes responsibility for the integrity of the data and the accuracy of the analysis. Study  
27  
28  
29 concept and design: CSK, PHH, YTC and SJL. Acquisition of data: YTC, CYH and CCC.  
30  
31  
32 Analysis and interpretation of data: CSK, YTC and PHH. Drafting of the manuscript:  
33  
34  
35 CSK, YTC, PHH, CYH and CCC. Statistical analysis: PHH and YTC. Administrative,  
36  
37  
38 technical, and/or material support: RHC, SJL, SCK, JWC and SJL. Critical revision:  
39  
40  
41 YTC, PHH and SJL. Study supervision: PHH and SJL. The Corresponding Authors  
42  
43  
44 have the right to grant on behalf of all authors and do grant on behalf of all authors a  
45  
46  
47 worldwide license to the Publisher and its licensees in perpetuity.  
48  
49  
50  
51  
52

53 **Funding:** This study was supported in part by research grants from the Ministry of  
54  
55  
56 Science and Technology of Taiwan (MOST 104-2314-B-075-047) and from Taipei  
57  
58  
59  
60

1  
2  
3  
4 Veterans General Hospital (V105C-0207, V106C-045). These funding agencies had no  
5  
6  
7 influence on the study design, data collection or analysis, decision to publish, or  
8  
9  
10 preparation of the manuscript.

11  
12  
13  
14  
15 **Competing Interest:** The authors report no potential conflicts of interest relevant to this  
16  
17  
18 article.  
19

20  
21  
22  
23  
24 **Ethics approval:** Institutional Review Board of Taipei City Hospital.  
25  
26  
27

28  
29  
30 **Data sharing statement:** The authors have obtained nationwide claims data for the  
31  
32  
33 period 2000–2013 from the Taiwan National Health Insurance Research Database  
34  
35  
36 (NHIRD). NHIRD does not permit external sharing of any of the data elements. No  
37  
38  
39 additional data are available.  
40  
41  
42  
43  
44  
45  
46  
47  
48  
49  
50  
51  
52  
53  
54  
55  
56  
57  
58  
59  
60

## References

1. Wild S, Roglic G, Green A, Sicree R, King H. Global prevalence of diabetes: estimates for the year 2000 and projections for 2030. *Diabetes Care* 2004;27(5):1047–1053
2. Eckel RH, Kahn R, Robertson RM, Rizza RA. Preventing cardiovascular disease and diabetes: a call to action from the American Diabetes Association and the American Heart Association. *Circulation* 2006;113(25):2943–2946
3. Buse JB, Ginsberg HN, Bakris GL, et al.; American Heart Association; American Diabetes Association. Primary prevention of cardiovascular diseases in people with diabetes mellitus: a scientific statement from the American Heart Association and the American Diabetes Association. *Diabetes Care* 2007;30:162–172
4. Ali MK, Bullard KM, Saaddine JB, Cowie CC, Imperatore G, Gregg EW. Achievement of goals in U.S. diabetes care, 1999–2010. *N Engl J Med* 2013;368:1613–1624
5. Domingueti CP, Dusse LM, Carvalho MD, de Sousa LP, Gomes KB, Fernandes AP. Diabetes mellitus: the linkage between oxidative stress, inflammation, hypercoagulability and vascular complications. *J Diabetes Complications* 2016;30(4):738–745
6. Kao JH, Chen DS. Global control of hepatitis B virus infection. *Lancet Infect Dis*

- 1  
2  
3  
4 2002;2(7):395–403  
5  
6  
7 7. Chen CL, Yang JY, Lin SF, Sun CA, Bai CH, You SL, Chen CJ, Kao JH, Chen PJ,  
8  
9  
10 Chen DS. Slow decline of hepatitis B burden in general population: results from a  
11  
12 population-based survey and longitudinal follow-up study in Taiwan. *J Hepatol*  
13  
14 2015;63(2):354–363  
15  
16  
17  
18 8. Chen DS. From hepatitis to hepatoma: lessons from type B viral hepatitis. *Science*  
19  
20 1993;262(5132):369–370  
21  
22  
23  
24 9. Domingueti CP, Dusse LM, Carvalho MD, de Sousa LP, Gomes KB, Fernandes AP.  
25  
26  
27 Diabetes mellitus: the linkage between oxidative stress, inflammation,  
28  
29 hypercoagulability and vascular complications. *J Diabetes Complications*  
30  
31 2016;30(4):738–745  
32  
33  
34  
35  
36 10. Jinjuvadia R, Liangpunsakul S. Association between metabolic syndrome and its  
37  
38 individual components with viral hepatitis B. *Am J Med Sci.* 2014;347(1):23–27  
39  
40  
41  
42 11. Jan CF, Chen CJ, Chiu YH, Chen LS, Wu HM, Huang CC, Yen MF, Chen TH. A  
43  
44 population-based study investigating the association between metabolic  
45  
46 syndrome and hepatitis B/C infection (Keelung Community-based Integrated  
47  
48 Screening study No. 10). *Int J Obes (Lond).* 2006;30(5):794–799.  
49  
50  
51  
52  
53 12. Volzke H, Schwahn C, Wolff B, Mentel R, Robinson DM, Kleine V, Felix SB, John U.  
54  
55  
56 Hepatitis B and C virus infection and the risk of atherosclerosis in a general  
57  
58  
59  
60

- 1  
2  
3  
4 population. *Atherosclerosis* 2004;174:99–103  
5  
6  
7 13. Tong DY, Wang XH, Xu CF, Yang YZ, Xiong SD. Hepatitis B virus infection and  
8  
9 coronary atherosclerosis: results from a population with relatively high prevalence  
10  
11 of hepatitis B virus. *World J Gastroenterol* 2005;11:1292–1296  
12  
13  
14  
15 14. Ishizaka N, Ishizaka Y, Takahashi E, Toda EE, Hashimoto H, Ohno M, Nagai R,  
16  
17 Yamakado M. Increased prevalence of carotid atherosclerosis in hepatitis B virus  
18  
19 carriers. *Circulation* 2002;105:1028–1030  
20  
21  
22  
23  
24 15. Sung J, Song YM, Choi YH, Ebrahim S, Davey SG. Hepatitis B virus seropositivity  
25  
26 and the risk of stroke and myocardial infarction. *Stroke* 2007;38:1436–1441  
27  
28  
29  
30 16. Wang CH, Chen CJ, Lee MH, Yang HI, Hsiao CK. Chronic hepatitis B infection and  
31  
32 risk of atherosclerosis-related mortality: a 17-year follow-up study based on 22,472  
33  
34 residents in Taiwan. *Atherosclerosis* 2010;211(2):624–629  
35  
36  
37  
38 17. Chen CJ, Yang HI, Su J, Jen CL, You SL, Lu SN, Huang GT, Iloeje UH;  
39  
40 REVEAL-HBV Study Group. Risk of hepatocellular carcinoma across a biological  
41  
42 gradient of serum hepatitis B virus DNA level. *JAMA* 2006;295:65–73  
43  
44  
45  
46  
47 18. Chao TF, Liu CJ, Chen SJ, Wang KL, Lin YJ, Chang SL, Lo LW, Hu YF, Tuan TC,  
48  
49 Chen TJ, Tsao HM, Chen SA. Hyperuricemia and the risk of ischemic stroke in  
50  
51 patients with atrial fibrillation: could it refine clinical risk stratification in AF? *Int J*  
52  
53  
54  
55  
56  
57  
58  
59  
60  
*Cardiol* 2014;170:344–349

- 1  
2  
3  
4 19. Chiu CC, Huang CC, Chan WL, Chung CM, Huang PH, Lin SJ, Chen JW, Leu HB.  
5  
6 Increased risk of ischemic stroke in patients with systemic lupus erythematosus: a  
7  
8 nationwide population-based study. *Intern Med* 2012;51:17–21  
9  
10
- 11  
12 20. Lin CC, Lai MS, Syu CY, Chang SC, Tseng FY. Accuracy of diabetes diagnosis in  
13  
14 health insurance claims data in Taiwan. *J Formos Med Assoc* 2005;104:157–163  
15  
16
- 17  
18 21. Cheng CL, Kao YH, Lin SJ, Lee CH, Lai ML. Validation of the National Health  
19  
20 Insurance Research Database with ischemic stroke cases in Taiwan.  
21  
22 *Pharmacoepidemiol Drug Saf* 2011;20:236–242  
23  
24
- 25  
26 22. Wu CY, Lin JT, Ho HJ, Su CW, Lee TY, Wang SY, Wu C, Wu JC. Association of  
27  
28 nucleos(t)ide analogue therapy with reduced risk of hepatocellular carcinoma in  
29  
30 patients with chronic hepatitis B: a nationwide cohort study. *Gastroenterology*  
31  
32  
33 2014;147(1):143–151  
34  
35
- 36  
37 23. Cheng CL, Lee CH, Chen PS, Li YH, Lin SJ, Yang YH. Validation of acute  
38  
39 myocardial infarction cases in the national health insurance research database in  
40  
41  
42 Taiwan. *J Epidemiol* 2014;24:500–507  
43  
44  
45
- 46  
47 24. Charlson ME, Pompei P, Ales KL, MacKenzie CR. A new method of classifying  
48  
49 prognostic comorbidity in longitudinal studies: development and validation. *J Chron*  
50  
51  
52 *Dis* 1987;40:373–383  
53  
54
- 55  
56 25. Austin PC. A critical appraisal of propensity-score matching in the medical literature  
57  
58  
59  
60



- 1  
2  
3  
4 between 1996 and 2003. *Stat Med* 2008;27:2037–2049
- 5  
6  
7 26. Jepsen P, Vilstrup H, Andersen PK. The clinical course of cirrhosis: The  
8  
9 importance of multistate models and competing risks analysis. *Hepatology*.  
10  
11 2015;62:292-302.
- 12  
13  
14  
15 27. Tseng CH. Factors Associated with Cancer- and Non-Cancer-Related Deaths  
16  
17 among Taiwanese Patients with Diabetes after 17 Years of Follow-Up. *PLoS One*.  
18  
19 2016;11(12):e0147916.
- 20  
21  
22  
23  
24 28. Hsieh HM, Lin TH, Lee IC, Huang CJ, Shin SJ, Chiu HC. The association  
25  
26 between participation in a pay-for-performance program and macrovascular  
27  
28 complications in patients with type 2 diabetes in Taiwan: A nationwide  
29  
30 population-based cohort study. *Prev Med*. 2016;85:53-9.
- 31  
32  
33  
34  
35  
36 29. Hayward RA, Reaven PD, Wiitala WL, Bahn GD, Reda DJ, Ge L, McCarren M,  
37  
38 Duckworth WC, Emanuele NV; VADT Investigators. Follow-up of glycemc  
39  
40 control and cardiovascular outcomes in type 2 diabetes. *N Engl J Med*  
41  
42 2015;372(23):2197–2206
- 43  
44  
45  
46  
47 30. ACCORD Study Group Writing Committee. 9-year effects of 3.7 years of  
48  
49 intensive glycemc control on cardiovascular outcomes. *Diabetes Care*  
50  
51 2016;39(5):701–708
- 52  
53  
54  
55  
56 31. Lipsitch M, Tchetgen Tchetgen E, Cohen T. Negative controls: a tool for detecting  
57  
58  
59  
60

- 1  
2  
3  
4 confounding and bias in observational studies. *Epidemiology* 2010;21(3):383–  
5  
6 388  
7  
8  
9  
10 32. Jarcuska P, Drazilova S, Fedacko J, Pella D, Janicko M. Association between  
11  
12 hepatitis B and metabolic syndrome: Current state of the art. *World J*  
13  
14 *Gastroenterol.* 2016;22(1):155–164  
15  
16  
17  
18 33. Meade TW, Stirling Y, Thompson SG, Ajdukiewicz A, Barbara JA, Chalmers DM.  
19  
20 Carriers of hepatitis B surface antigen: possible association between low levels of  
21  
22 clotting factors and protection against ischaemic heart disease. *Thromb Res*  
23  
24 1987;45(5):709–713  
25  
26  
27  
28  
29  
30 34. Crook PD, Jones ME, Hall AJ. Mortality of hepatitis B surface antigen-positive  
31  
32 blood donors in England and Wales. *Int J Epidemiol* 2003;32:118–124  
33  
34  
35  
36 35. Amin J, Law MG, Bartlett M, Kaldor JM, Dore GJ. Causes of death after diagnosis  
37  
38 of hepatitis B or hepatitis C infection: a large community-based linkage study.  
39  
40  
41 *Lancet* 2006;368(9539):938–945  
42  
43  
44  
45 36. Chen G, Lin W, Shen F, Iloeje UH, London WT, Evans AA. Chronic hepatitis B  
46  
47 virus infection and mortality from non-liver causes: results from the Haimen City  
48  
49 cohort study. *Int J Epidemiol* 2005;34:132–137  
50  
51  
52  
53 37. Haffner SM, Lehto S, Ronnema T, Pyorala K, Laakso M. Mortality from coronary  
54  
55 heart disease in subjects with type 2 diabetes and in nondiabetic subjects with and  
56  
57  
58  
59  
60

1  
2  
3  
4 without prior myocardial infarction. N Engl J Med 1998;339:229–234  
5  
6  
7  
8  
9  
10  
11  
12  
13  
14  
15  
16  
17  
18  
19  
20  
21  
22  
23  
24  
25  
26  
27  
28  
29  
30  
31  
32  
33  
34  
35  
36  
37  
38  
39  
40  
41  
42  
43  
44  
45  
46  
47  
48  
49  
50  
51  
52  
53  
54  
55  
56  
57  
58  
59  
60

For peer review only

## FIGURE LEGENDS

**Figure 1** Flow diagram of cohort selection. The study cohort consisted of 40,162 diabetic patients with chronic HBV infection and 40,162 matched control subjects without HBV infection.

**Figure 2** The cumulative incidence of all-cause mortality (A) and major adverse cardiovascular events (B) among diabetic patients with chronic HBV infection and matched control subjects without HBV infection.

**Figure 3** Results of multivariable stratified subgroup analyses, showing the effects of chronic HBV infection on all-cause mortality (A) and major adverse cardiovascular events (B).

**Table 1** Baseline characteristics of diabetic patients

| Characteristic                                                                   | Propensity score-matched |                | Standardised difference* |
|----------------------------------------------------------------------------------|--------------------------|----------------|--------------------------|
|                                                                                  | HBV cohort               | Control cohort |                          |
| Patients ( <i>n</i> )                                                            | 40,162                   | 40,162         |                          |
| Mean age (SD), years                                                             | 52.7 (11.6)              | 52.7 (11.5)    | 0.002                    |
| Sex (male)                                                                       | 25,173 (62.7)            | 25,173 (62.7)  | 0.000                    |
| Monthly income, NT\$                                                             |                          |                |                          |
| Dependent                                                                        | 8,787 (21.9)             | 8,510 (21.2)   | 0.017                    |
| <19,100                                                                          | 6,859 (17.1)             | 6,342 (15.8)   | 0.035                    |
| 19,100–41,999                                                                    | 18,910 (47.1)            | 19,343 (48.2)  | -0.022                   |
| ≥42,000                                                                          | 5,606 (14.0)             | 5,967 (14.9)   | -0.026                   |
| Urbanisation level                                                               |                          |                |                          |
| 1 (urban)                                                                        | 14,845 (37.0)            | 15,501 (38.6)  | -0.034                   |
| 2                                                                                | 23,400 (58.3)            | 22,828 (56.8)  | 0.029                    |
| 3                                                                                | 1,593 (4.0)              | 1,498 (3.7)    | 0.012                    |
| 4 (rural)                                                                        | 324 (0.8)                | 335 (0.8)      | -0.003                   |
| Outpatient visits to metabolism and endocrinology professionals in the past year |                          |                |                          |
| 0–5                                                                              | 35,055 (87.3)            | 34,947 (87.0)  | 0.008                    |
| 6–10                                                                             | 3,752 (9.3)              | 3,774 (9.4)    | -0.002                   |
| 11–15                                                                            | 975 (2.4)                | 1,049 (2.6)    | -0.012                   |
| >15                                                                              | 380 (0.9)                | 382 (1.0)      | -0.003                   |
| Charlson Comorbidity Index score, median (IQR)                                   | 6 (5–8)                  | 6 (4–8)        | 0.035                    |
| Adapted Diabetes Complications Severity Index score, median (IQR) <sup>†</sup>   | 0 (0–1)                  | 0 (0–1)        | -0.001                   |
| Median (IQR) duration of diabetes mellitus, months                               | 38 (12–74)               | 39 (16–73)     | -0.024                   |
| Anti-hypertensive drug use                                                       |                          |                |                          |
| Alpha blocker                                                                    | 420 (1.0)                | 362 (0.9)      | 0.015                    |
| ACE inhibitor or ARB                                                             | 3,885 (9.7)              | 3,950 (9.8)    | -0.005                   |
| Beta blocker                                                                     | 3,256 (8.1)              | 3,337 (8.3)    | -0.007                   |
| Calcium channel blocker                                                          | 3,887 (9.7)              | 3,866 (9.6)    | 0.002                    |
| Diuretic                                                                         | 2,701 (6.7)              | 2,507 (6.2)    | 0.020                    |

|    |                                                                                                                                                                                                                                                                                                         |               |               |        |
|----|---------------------------------------------------------------------------------------------------------------------------------------------------------------------------------------------------------------------------------------------------------------------------------------------------------|---------------|---------------|--------|
| 1  |                                                                                                                                                                                                                                                                                                         |               |               |        |
| 2  |                                                                                                                                                                                                                                                                                                         |               |               |        |
| 3  | Anti-diabetic drug use                                                                                                                                                                                                                                                                                  |               |               |        |
| 4  |                                                                                                                                                                                                                                                                                                         |               |               |        |
| 5  | Acarbose                                                                                                                                                                                                                                                                                                | 823 (2.0)     | 886 (2.2)     | -0.011 |
| 6  | Sulfonylurea                                                                                                                                                                                                                                                                                            | 7,374 (18.4)  | 7,795 (19.4)  | -0.027 |
| 7  | Insulin                                                                                                                                                                                                                                                                                                 | 865 (2.2)     | 831 (2.1)     | 0.006  |
| 8  |                                                                                                                                                                                                                                                                                                         |               |               |        |
| 9  | Metformin                                                                                                                                                                                                                                                                                               | 6,921 (17.2)  | 7,235 (18.0)  | -0.021 |
| 10 | Thiazolidinedione                                                                                                                                                                                                                                                                                       | 689 (1.7)     | 707 (1.8)     | -0.003 |
| 11 |                                                                                                                                                                                                                                                                                                         |               |               |        |
| 12 | Dipeptidyl peptidase-4 inhibitor                                                                                                                                                                                                                                                                        | 398 (1.0)     | 458 (1.1)     | -0.015 |
| 13 | Other concomitant medications                                                                                                                                                                                                                                                                           |               |               |        |
| 14 |                                                                                                                                                                                                                                                                                                         |               |               |        |
| 15 | Antiplatelet agent                                                                                                                                                                                                                                                                                      | 2,097 (5.2)   | 2,073 (5.2)   | 0.003  |
| 16 | NSAID                                                                                                                                                                                                                                                                                                   | 8,662 (21.6)  | 8,728 (21.7)  | -0.004 |
| 17 | Proton pump inhibitor                                                                                                                                                                                                                                                                                   | 1,836 (4.6)   | 1,436 (3.6)   | 0.050  |
| 18 | Steroid                                                                                                                                                                                                                                                                                                 | 2,005 (5.0)   | 1,942 (4.8)   | 0.007  |
| 19 | Antidepressant                                                                                                                                                                                                                                                                                          | 1,117 (2.8)   | 1,137 (2.8)   | -0.003 |
| 20 |                                                                                                                                                                                                                                                                                                         |               |               |        |
| 21 | Statin                                                                                                                                                                                                                                                                                                  | 1,701 (4.2)   | 1,718 (4.3)   | -0.002 |
| 22 |                                                                                                                                                                                                                                                                                                         |               |               |        |
| 23 | Comorbidities                                                                                                                                                                                                                                                                                           |               |               |        |
| 24 |                                                                                                                                                                                                                                                                                                         |               |               |        |
| 25 | Coronary artery disease                                                                                                                                                                                                                                                                                 | 9,694 (24.1)  | 9,731 (24.2)  | -0.002 |
| 26 | Hypertension                                                                                                                                                                                                                                                                                            | 19,839 (49.4) | 19,859 (49.4) | -0.001 |
| 27 | Heart failure                                                                                                                                                                                                                                                                                           | 2,002 (5.0)   | 1,791 (4.5)   | 0.025  |
| 28 | Peripheral vascular disease                                                                                                                                                                                                                                                                             | 1,369 (3.4)   | 1,543 (3.8)   | -0.023 |
| 29 | Chronic kidney disease                                                                                                                                                                                                                                                                                  | 5,929 (14.8)  | 5,916 (14.7)  | 0.001  |
| 30 | Atrial fibrillation                                                                                                                                                                                                                                                                                     | 472 (1.2)     | 399 (1.0)     | 0.018  |
| 31 | Dyslipidaemia                                                                                                                                                                                                                                                                                           | 22,827 (56.8) | 23,813 (59.3) | -0.050 |
| 32 | Valvular heart disease                                                                                                                                                                                                                                                                                  | 2,588 (6.4)   | 2,547 (6.3)   | 0.004  |
| 33 | Cancer                                                                                                                                                                                                                                                                                                  | 6,835 (17.0)  | 6,546 (16.3)  | 0.019  |
| 34 | Autoimmune disease                                                                                                                                                                                                                                                                                      | 1,543 (3.8)   | 1,559 (3.9)   | -0.002 |
| 35 | Dialysis                                                                                                                                                                                                                                                                                                | 386 (1.0)     | 345 (0.9)     | 0.011  |
| 36 | Physical limitation                                                                                                                                                                                                                                                                                     | 1,592 (4.0)   | 1,606 (4.0)   | -0.002 |
| 37 |                                                                                                                                                                                                                                                                                                         |               |               |        |
| 38 | Propensity score, mean (SD)                                                                                                                                                                                                                                                                             | 0.08 (0.06)   | 0.08 (0.06)   | 0.000  |
| 39 |                                                                                                                                                                                                                                                                                                         |               |               |        |
| 40 |                                                                                                                                                                                                                                                                                                         |               |               |        |
| 41 |                                                                                                                                                                                                                                                                                                         |               |               |        |
| 42 |                                                                                                                                                                                                                                                                                                         |               |               |        |
| 43 |                                                                                                                                                                                                                                                                                                         |               |               |        |
| 44 | Data are presented as <i>n</i> (%) except where otherwise indicated.                                                                                                                                                                                                                                    |               |               |        |
| 45 | *Imbalance defined as absolute value > 0.014.                                                                                                                                                                                                                                                           |               |               |        |
| 46 | †A 13-point scale with 7 complication categories: retinopathy, nephropathy, neuropathy, cerebrovascular, cardiovascular, peripheral vascular disease, and metabolic. Each complication is given a numeric score ranging from 0 to 2 (0 = no abnormality, 1 = some abnormality, 2 = severe abnormality). |               |               |        |
| 47 |                                                                                                                                                                                                                                                                                                         |               |               |        |
| 48 |                                                                                                                                                                                                                                                                                                         |               |               |        |
| 49 |                                                                                                                                                                                                                                                                                                         |               |               |        |
| 50 |                                                                                                                                                                                                                                                                                                         |               |               |        |
| 51 |                                                                                                                                                                                                                                                                                                         |               |               |        |
| 52 | <i>Abbreviations:</i> HBV, hepatitis B virus; SD, standard deviation; IQR, interquartile range;                                                                                                                                                                                                         |               |               |        |
| 53 | ACE, angiotensin-converting enzyme; ARB, angiotensin II receptor blocker; NSAID,                                                                                                                                                                                                                        |               |               |        |
| 54 | non-steroidal anti-inflammatory drug.                                                                                                                                                                                                                                                                   |               |               |        |
| 55 |                                                                                                                                                                                                                                                                                                         |               |               |        |
| 56 |                                                                                                                                                                                                                                                                                                         |               |               |        |
| 57 |                                                                                                                                                                                                                                                                                                         |               |               |        |
| 58 |                                                                                                                                                                                                                                                                                                         |               |               |        |
| 59 |                                                                                                                                                                                                                                                                                                         |               |               |        |
| 60 |                                                                                                                                                                                                                                                                                                         |               |               |        |

**Table 2** Incidence and risks of all-cause mortality, myocardial infarction, stroke, hospitalisation for heart failure, and cancer after propensity score matching

|                       | HBV cohort    |              |                 | Control cohort (reference) |              |                 | Crude                 |         | Adjusted               |         |
|-----------------------|---------------|--------------|-----------------|----------------------------|--------------|-----------------|-----------------------|---------|------------------------|---------|
|                       | No. of events | Person-years | Incidence rate* | No. of events              | Person-years | Incidence rate* | Hazard ratio (95% CI) | p value | Hazard ratio† (95% CI) | p value |
| All-cause mortality   | 6,027         | 223,588      | 26.96           | 7,140                      | 202,307      | 35.29           | 0.78 (0.76–0.81)      | <0.001  | 0.72 (0.70–0.75)       | <0.001  |
| MACE‡                 | 1,098         | 220,605      | 4.98            | 1,663                      | 198,131      | 8.39            | 0.59 (0.55–0.64)      | <0.001  | 0.58 (0.53–0.62)       | <0.001  |
| Myocardial infarction | 308           | 222,847      | 1.38            | 554                        | 201,078      | 2.76            | 0.50 (0.43–0.57)      | <0.001  | 0.49 (0.42–0.56)       | <0.001  |
| Ischemic stroke       | 822           | 221,298      | 3.71            | 1,171                      | 199,259      | 5.88            | 0.63 (0.57–0.69)      | <0.001  | 0.61 (0.56–0.67)       | <0.001  |
| Heart failure         | 249           | 223,050      | 1.12            | 405                        | 201,494      | 2.01            | 0.55 (0.47–0.65)      | <0.001  | 0.50 (0.43–0.59)       | <0.001  |
| HCC                   | 1,590         | 220,573      | 7.21            | 153                        | 202,145      | 0.76            | 9.58 (8.12–11.31)     | <0.001  | 9.34 (7.91–11.03)      | <0.001  |
| Acute appendicitis    | 222           | 222,682      | 1.00            | 179                        | 201,644      | 0.89            | 1.13 (0.93–1.37)      | 0.233   | 1.13 (0.93–1.38)       | 0.227   |

\*Per 10<sup>3</sup> person-years.

†Adjusted for monthly income, urbanisation level, Charlson Comorbidity Index score, dipeptidyl peptidase-4 inhibitor use, metformin use, sulfonylurea use, alpha blocker use, dyslipidaemia, atrial fibrillation, peripheral vascular disease, and heart failure.

‡Myocardial infarction and ischemic stroke.

Abbreviations: HBV, hepatitis B virus; MACE, major adverse cardiovascular event; HCC, hepatocellular carcinoma.

1  
2  
3  
4  
5  
6  
7  
8  
9  
10  
11  
12  
13  
14  
15  
16  
17  
18  
19  
20  
21  
22  
23  
24  
25  
26  
27  
28  
29  
30  
31  
32  
33  
34  
35  
36  
37  
38  
39  
40  
41  
42  
43  
44  
45  
46  
47  
48  
49  
50  
51  
52  
53  
54  
55  
56  
57  
58  
59  
60

For peer review only



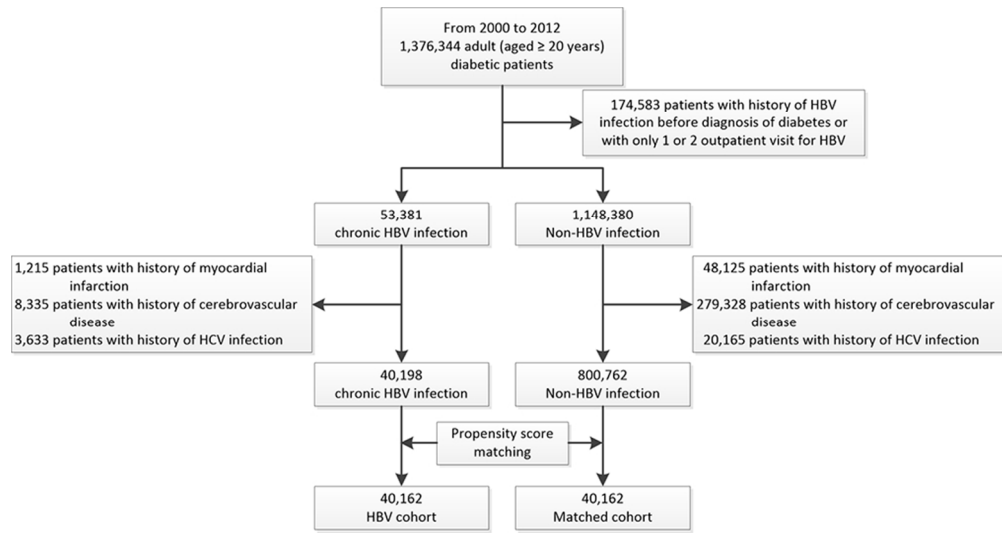

Figure 1 Flow diagram of cohort selection. The study cohort consisted of 40,162 diabetic patients with chronic HBV infection and 40,162 matched control subjects without HBV infection.

86x45mm (300 x 300 DPI)

review only

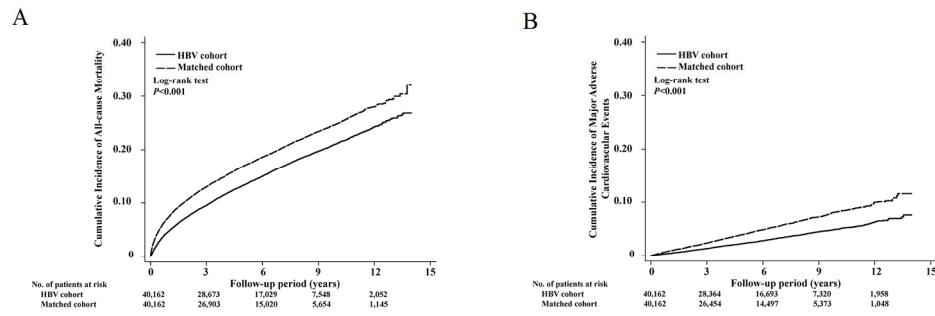

Figure 2 The cumulative incidence of all-cause mortality (A) and major adverse cardiovascular events (B) among diabetic patients with chronic HBV infection and matched control subjects without HBV infection.

172x60mm (300 x 300 DPI)

Peer review only

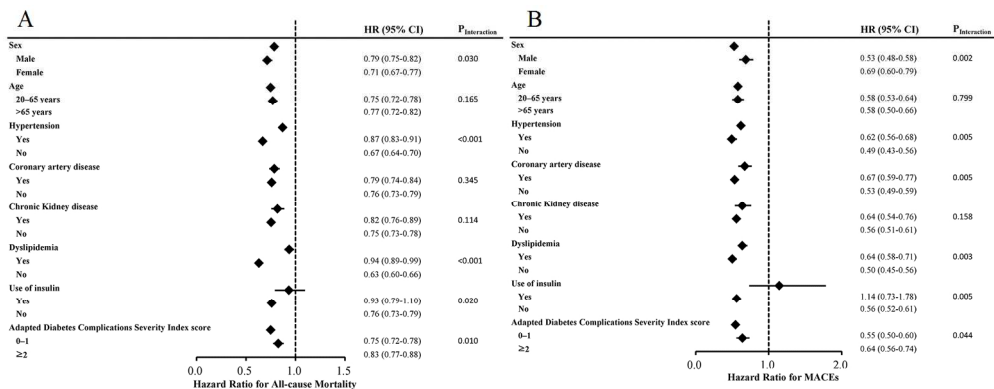

Figure 3 Results of multivariable stratified subgroup analyses, showing the effects of chronic HBV infection on all-cause mortality (A) and major adverse cardiovascular events (B).

172x67mm (300 x 300 DPI)

Peer review only

**Supplemental Table A1** Propensity score model results for the probability of diagnosis of HBV infection

| Parameter            | Estimate | Odds ratio | 95% CI |       | p value |
|----------------------|----------|------------|--------|-------|---------|
|                      |          |            | Lower  | Upper |         |
| Age, per year        | -0.0411  | 0.96       | 0.959  | 0.961 | <0.0001 |
| Male sex             | 0.4718   | 1.603      | 1.568  | 1.638 | <0.0001 |
| Year of index date   |          |            |        |       |         |
| 2000                 |          | 1          |        |       |         |
| 2001                 | -0.1146  | 0.892      | 0.822  | 0.967 | 0.0055  |
| 2002                 | -0.2589  | 0.772      | 0.714  | 0.835 | <0.0001 |
| 2003                 | -0.4023  | 0.669      | 0.619  | 0.723 | <0.0001 |
| 2004                 | -0.4794  | 0.619      | 0.575  | 0.667 | <0.0001 |
| 2005                 | -0.5758  | 0.562      | 0.523  | 0.605 | <0.0001 |
| 2006                 | -0.6641  | 0.515      | 0.479  | 0.553 | <0.0001 |
| 2007                 | -0.7626  | 0.466      | 0.434  | 0.501 | <0.0001 |
| 2008                 | -0.8804  | 0.415      | 0.386  | 0.446 | <0.0001 |
| 2009                 | -0.9874  | 0.373      | 0.347  | 0.401 | <0.0001 |
| 2010                 | -1.0996  | 0.333      | 0.31   | 0.358 | <0.0001 |
| 2011                 | -1.2988  | 0.273      | 0.254  | 0.293 | <0.0001 |
| 2012                 | -1.3871  | 0.25       | 0.232  | 0.269 | <0.0001 |
| Month of index date  |          |            |        |       |         |
| January              |          | 1          |        |       |         |
| February             | -0.0141  | 0.986      | 0.933  | 1.042 | 0.6135  |
| March                | -0.0354  | 0.965      | 0.916  | 1.016 | 0.18    |
| April                | -0.0224  | 0.978      | 0.929  | 1.03  | 0.3935  |
| May                  | -0.044   | 0.957      | 0.909  | 1.007 | 0.0913  |
| June                 | -0.0566  | 0.945      | 0.897  | 0.995 | 0.0315  |
| July                 | -0.0694  | 0.933      | 0.887  | 0.982 | 0.0074  |
| August               | -0.0812  | 0.922      | 0.876  | 0.97  | 0.0017  |
| September            | -0.1023  | 0.903      | 0.858  | 0.95  | <0.0001 |
| October              | -0.0938  | 0.91       | 0.865  | 0.958 | 0.0003  |
| November             | -0.116   | 0.891      | 0.846  | 0.937 | <0.0001 |
| December             | -0.1214  | 0.886      | 0.842  | 0.932 | <0.0001 |
| Monthly income, NT\$ |          |            |        |       |         |
| Dependent            |          | 1          |        |       |         |
| <19,100              | -0.1658  | 0.847      | 0.819  | 0.876 | <0.0001 |
| 19,100–41,999        | 0.1102   | 1.116      | 1.087  | 1.147 | <0.0001 |
| ≥42,000              | 0.2833   | 1.328      | 1.279  | 1.377 | <0.0001 |

|    |                                                                                  |         |       |       |       |         |
|----|----------------------------------------------------------------------------------|---------|-------|-------|-------|---------|
| 1  |                                                                                  |         |       |       |       |         |
| 2  |                                                                                  |         |       |       |       |         |
| 3  |                                                                                  |         |       |       |       |         |
| 4  | Urbanisation level                                                               |         |       |       |       |         |
| 5  | 1 (urban)                                                                        |         | 1     |       |       |         |
| 6  |                                                                                  |         |       |       |       |         |
| 7  | 2                                                                                | -0.0904 | 0.914 | 0.894 | 0.934 | <0.0001 |
| 8  | 3                                                                                | -0.1119 | 0.894 | 0.847 | 0.944 | <0.0001 |
| 9  |                                                                                  |         |       |       |       |         |
| 10 | 4 (rural)                                                                        | -0.0171 | 0.983 | 0.877 | 1.103 | 0.7708  |
| 11 | Outpatient visits to metabolism and endocrinology professionals in the past year |         |       |       |       |         |
| 12 | 0                                                                                |         |       |       |       |         |
| 13 |                                                                                  |         |       |       |       |         |
| 14 | 1–5                                                                              | 0.158   | 1.171 | 1.13  | 1.214 | <0.0001 |
| 15 |                                                                                  |         |       |       |       |         |
| 16 | 6–10                                                                             | -0.1084 | 0.897 | 0.84  | 0.959 | 0.0014  |
| 17 |                                                                                  |         |       |       |       |         |
| 18 | >10                                                                              | -0.0625 | 0.939 | 0.845 | 1.044 | 0.2474  |
| 19 | Charlson Comorbidity Index score <sup>a</sup>                                    | 0.1398  | 1.15  | 1.143 | 1.157 | <0.0001 |
| 20 | Adapted Diabetes Complications                                                   |         | 0.93  | 0.917 | 0.942 |         |
| 21 | Severity Index score <sup>b</sup>                                                | -0.073  |       |       |       | <0.0001 |
| 22 |                                                                                  |         |       |       |       |         |
| 23 | Duration of diabetes, months                                                     | 0.0028  | 1.003 | 1.003 | 1.003 | <0.0001 |
| 24 |                                                                                  |         |       |       |       |         |
| 25 | Anti-diabetic drugs                                                              |         |       |       |       |         |
| 26 |                                                                                  |         |       |       |       |         |
| 27 | Acarbose                                                                         | 0.0507  | 1.052 | 0.977 | 1.133 | 0.18    |
| 28 |                                                                                  |         |       |       |       |         |
| 29 | Sulfonylurea                                                                     | 0.1154  | 1.122 | 1.084 | 1.162 | <0.0001 |
| 30 |                                                                                  |         |       |       |       |         |
| 31 | Insulin                                                                          | 0.2091  | 1.233 | 1.145 | 1.327 | <0.0001 |
| 32 |                                                                                  |         |       |       |       |         |
| 33 | Metformin                                                                        | 0.151   | 1.163 | 1.122 | 1.206 | <0.0001 |
| 34 |                                                                                  |         |       |       |       |         |
| 35 | Thiazolidinedione                                                                | -0.3096 | 0.734 | 0.677 | 0.795 | <0.0001 |
| 36 |                                                                                  |         |       |       |       |         |
| 37 | Dipeptidyl peptidase-4 inhibitor                                                 | 0.0812  | 1.085 | 0.976 | 1.205 | 0.1308  |
| 38 | Anti-hypertensive drugs                                                          |         |       |       |       |         |
| 39 |                                                                                  |         |       |       |       |         |
| 40 | Alpha blocker                                                                    | -0.081  | 0.922 | 0.833 | 1.02  | 0.1164  |
| 41 |                                                                                  |         |       |       |       |         |
| 42 | Beta blocker                                                                     | 0.032   | 1.032 | 0.991 | 1.076 | 0.1247  |
| 43 |                                                                                  |         |       |       |       |         |
| 44 | Calcium channel blocker                                                          | -0.0569 | 0.945 | 0.908 | 0.982 | 0.0044  |
| 45 |                                                                                  |         |       |       |       |         |
| 46 | Diuretic                                                                         | 0.3296  | 1.39  | 1.33  | 1.454 | <0.0001 |
| 47 |                                                                                  |         |       |       |       |         |
| 48 | ACE inhibitor/ARB                                                                | -0.0856 | 0.918 | 0.882 | 0.955 | <0.0001 |
| 49 | Other concomitant medications                                                    |         |       |       |       |         |
| 50 |                                                                                  |         |       |       |       |         |
| 51 | Antiplatelet                                                                     | -0.185  | 0.831 | 0.791 | 0.873 | <0.0001 |
| 52 |                                                                                  |         |       |       |       |         |
| 53 | Steroid                                                                          | -0.1578 | 0.854 | 0.814 | 0.896 | <0.0001 |
| 54 |                                                                                  |         |       |       |       |         |
| 55 | Antidepressant                                                                   | 0.0542  | 1.056 | 0.991 | 1.125 | 0.0936  |
| 56 |                                                                                  |         |       |       |       |         |
| 57 | Statin                                                                           | -0.4718 | 0.624 | 0.592 | 0.658 | <0.0001 |
| 58 |                                                                                  |         |       |       |       |         |
| 59 | PPI                                                                              | 1.1059  | 3.022 | 2.864 | 3.189 | <0.0001 |
| 60 |                                                                                  |         |       |       |       |         |
| 61 | NSAID                                                                            | 0.0767  | 1.08  | 1.053 | 1.108 | <0.0001 |
| 62 | Comorbidities                                                                    |         |       |       |       |         |
| 63 |                                                                                  |         |       |       |       |         |
| 64 | Hypertension                                                                     | -0.1764 | 0.838 | 0.818 | 0.859 | <0.0001 |
| 65 |                                                                                  |         |       |       |       |         |
| 66 | Coronary artery disease                                                          | 0.0571  | 1.059 | 1.028 | 1.09  | 0.0002  |
| 67 |                                                                                  |         |       |       |       |         |
| 68 | Heart failure                                                                    | -0.3525 | 0.703 | 0.666 | 0.741 | <0.0001 |

|    |                        |         |       |       |       |         |
|----|------------------------|---------|-------|-------|-------|---------|
| 1  |                        |         |       |       |       |         |
| 2  |                        |         |       |       |       |         |
| 3  |                        |         |       |       |       |         |
| 4  | Peptic ulcer disease   | 0.1731  | 1.189 | 1.162 | 1.217 | <0.0001 |
| 5  | Chronic kidney disease | 0.0234  | 1.024 | 0.993 | 1.055 | 0.1335  |
| 6  | Atrial fibrillation    | -0.1366 | 0.872 | 0.792 | 0.961 | 0.0057  |
| 7  | Dyslipidaemia          | 0.103   | 1.108 | 1.084 | 1.133 | <0.0001 |
| 8  | Valvular heart disease | 0.0353  | 1.036 | 0.992 | 1.082 | 0.1102  |
| 9  | Cancer                 | 0.1052  | 1.111 | 1.07  | 1.153 | <0.0001 |
| 10 | Autoimmune disease     | 0.0809  | 1.084 | 1.028 | 1.144 | 0.0031  |
| 11 | Physical limitation    | 0.0747  | 1.078 | 1.021 | 1.137 | 0.0063  |
| 12 |                        |         |       |       |       |         |
| 13 |                        |         |       |       |       |         |
| 14 |                        |         |       |       |       |         |
| 15 |                        |         |       |       |       |         |

<sup>a</sup> Used to determine overall systemic health; each increase reflects a stepwise increase in cumulative mortality.

<sup>b</sup> A 13-point scale with 7 complication categories: retinopathy, nephropathy, neuropathy, cerebrovascular, cardiovascular, peripheral vascular disease, and metabolic. Each complication is given a numeric score ranging from 0 to 2 (0 = no abnormality, 1 = some abnormality, 2 = severe abnormality).

*Abbreviations:* CI, confidence interval; ACE, angiotensin-converting enzyme; ARB, angiotensin II receptor blocker; PPI, proton pump inhibitor; NSAID, non-steroidal anti-inflammatory drug.

**Supplemental Table A2** Results of subgroup analyses of mortality risk among diabetic patients with HBV infection and matched control subjects

| Characteristic                                         | Adjusted <sup>a</sup>    |                | Interaction<br><i>p</i> value |
|--------------------------------------------------------|--------------------------|----------------|-------------------------------|
|                                                        | Hazard ratio<br>(95% CI) | <i>p</i> value |                               |
| Sex                                                    |                          |                |                               |
| Male                                                   | 0.785 (0.754–0.817)      | <0.001         | 0.030                         |
| Female                                                 | 0.714 (0.667–0.765)      | <0.001         |                               |
| Age                                                    |                          |                |                               |
| 20–65 years                                            | 0.749 (0.719–0.781)      | <0.001         | 0.165                         |
| >65 years                                              | 0.770 (0.724–0.819)      | <0.001         |                               |
| Hypertension                                           |                          |                |                               |
| Yes                                                    | 0.870 (0.831–0.912)      | <0.001         | <0.001                        |
| No                                                     | 0.668 (0.635–0.703)      | <0.001         |                               |
| Coronary artery disease                                |                          |                |                               |
| Yes                                                    | 0.786 (0.735–0.840)      | <0.001         | 0.345                         |
| No                                                     | 0.759 (0.729–0.790)      | <0.001         |                               |
| Chronic kidney disease                                 |                          |                |                               |
| Yes                                                    | 0.818 (0.757–0.886)      | <0.001         | 0.114                         |
| No                                                     | 0.754 (0.726–0.784)      | <0.001         |                               |
| Dyslipidaemia                                          |                          |                |                               |
| Yes                                                    | 0.936 (0.887–0.986)      | 0.014          | <0.001                        |
| No                                                     | 0.630 (0.602–0.659)      | <0.001         |                               |
| Use of insulin                                         |                          |                |                               |
| Yes                                                    | 0.932 (0.792–1.096)      | 0.395          | 0.020                         |
| No                                                     | 0.759 (0.733–0.786)      | <0.001         |                               |
| Adapted Diabetes Complications<br>Severity Index score |                          |                |                               |
| 0–1                                                    | 0.749 (0.719–0.780)      | <0.001         | 0.010                         |
| ≥2                                                     | 0.826 (0.774–0.881)      | <0.001         |                               |

<sup>a</sup>Adjusted for monthly income, urbanisation level, Charlson Comorbidity Index score, dipeptidyl peptidase-4 inhibitor use, metformin use, sulfonylurea use, alpha blocker use, dyslipidaemia, atrial fibrillation, peripheral vascular disease, and heart failure.

**Supplemental Table A3** Results of subgroup analysis of risk of MACE among diabetic patients with HBV infection and matched control subjects

| Characteristic                                         | Adjusted <sup>a</sup>    |         | Interaction<br>p value |
|--------------------------------------------------------|--------------------------|---------|------------------------|
|                                                        | Hazard ratio<br>(95% CI) | p value |                        |
| Sex                                                    |                          |         |                        |
| Male                                                   | 0.526 (0.480–0.576)      | <0.001  | 0.002                  |
| Female                                                 | 0.686 (0.596–0.789)      | <0.001  |                        |
| Age                                                    |                          |         |                        |
| 20–65 years                                            | 0.579 (0.528–0.636)      | <0.001  | 0.799                  |
| >65 years                                              | 0.575 (0.502–0.659)      | <0.001  |                        |
| Hypertension                                           |                          |         |                        |
| Yes                                                    | 0.619 (0.563–0.680)      | <0.001  | 0.005                  |
| No                                                     | 0.493 (0.431–0.564)      | <0.001  |                        |
| Coronary artery disease                                |                          |         |                        |
| Yes                                                    | 0.670 (0.585–0.766)      | <0.001  | 0.005                  |
| No                                                     | 0.533 (0.486–0.585)      | <0.001  |                        |
| Chronic kidney disease                                 |                          |         |                        |
| Yes                                                    | 0.638 (0.536–0.760)      | <0.001  | 0.158                  |
| No                                                     | 0.558 (0.512–0.607)      | <0.001  |                        |
| Dyslipidaemia                                          |                          |         |                        |
| Yes                                                    | 0.638 (0.576–0.707)      | <0.001  | 0.003                  |
| No                                                     | 0.501 (0.447–0.562)      | <0.001  |                        |
| Use of insulin                                         |                          |         |                        |
| Yes                                                    | 1.143 (0.734–1.781)      | 0.555   | 0.005                  |
| No                                                     | 0.560 (0.518–0.605)      | <0.001  |                        |
| Adapted Diabetes Complications<br>Severity Index score |                          |         |                        |
| 0–1                                                    | 0.545 (0.497–0.598)      | <0.001  | 0.044                  |
| ≥2                                                     | 0.640 (0.557–0.735)      | <0.001  |                        |

<sup>a</sup>Adjusted for monthly income, urbanisation level, Charlson Comorbidity Index score, dipeptidyl peptidase-4 inhibitor use, metformin use, sulfonylurea use, alpha blocker use, dyslipidaemia, atrial fibrillation, peripheral vascular disease, and heart failure.



STROBE 2007 (v4) Statement—Checklist of items that should be included in reports of *case-control studies*

| Section/Topic                | Item # | Recommendation                                                                                                                                                                       | Reported on page # |
|------------------------------|--------|--------------------------------------------------------------------------------------------------------------------------------------------------------------------------------------|--------------------|
| Title and abstract           | 1      | (a) Indicate the study's design with a commonly used term in the title or the abstract                                                                                               | Page 1             |
|                              |        | (b) Provide in the abstract an informative and balanced summary of what was done and what was found                                                                                  | Page 4             |
| <b>Introduction</b>          |        |                                                                                                                                                                                      |                    |
| Background/rationale         | 2      | Explain the scientific background and rationale for the investigation being reported                                                                                                 | Page 7             |
| Objectives                   | 3      | State specific objectives, including any prespecified hypotheses                                                                                                                     | Page 8             |
| <b>Methods</b>               |        |                                                                                                                                                                                      |                    |
| Study design                 | 4      | Present key elements of study design early in the paper                                                                                                                              | Page 9             |
| Setting                      | 5      | Describe the setting, locations, and relevant dates, including periods of recruitment, exposure, follow-up, and data collection                                                      | Page 8,9, 10       |
| Participants                 | 6      | (a) Give the eligibility criteria, and the sources and methods of case ascertainment and control selection. Give the rationale for the choice of cases and controls                  | Page 10            |
|                              |        | (b) For matched studies, give matching criteria and the number of controls per case                                                                                                  | Page 10            |
| Variables                    | 7      | Clearly define all outcomes, exposures, predictors, potential confounders, and effect modifiers. Give diagnostic criteria, if applicable                                             | Page 11            |
| Data sources/<br>measurement | 8*     | For each variable of interest, give sources of data and details of methods of assessment (measurement). Describe comparability of assessment methods if there is more than one group | Page 8             |
| Bias                         | 9      | Describe any efforts to address potential sources of bias                                                                                                                            | Page 11, 12, 13    |
| Study size                   | 10     | Explain how the study size was arrived at                                                                                                                                            | Page 9,10          |
| Quantitative variables       | 11     | Explain how quantitative variables were handled in the analyses. If applicable, describe which groupings were chosen and why                                                         | Page 11            |
| Statistical methods          | 12     | (a) Describe all statistical methods, including those used to control for confounding                                                                                                | Page 11, 12, 13    |
|                              |        | (b) Describe any methods used to examine subgroups and interactions                                                                                                                  | Page 12, 13        |
|                              |        | (c) Explain how missing data were addressed                                                                                                                                          | Page 12, 13        |
|                              |        | (d) If applicable, explain how matching of cases and controls was addressed                                                                                                          | Page 12, 13        |
|                              |        | (e) Describe any sensitivity analyses                                                                                                                                                | Page 12, 13        |
| <b>Results</b>               |        |                                                                                                                                                                                      |                    |

|                          |     |                                                                                                                                                                                                              |                                |
|--------------------------|-----|--------------------------------------------------------------------------------------------------------------------------------------------------------------------------------------------------------------|--------------------------------|
| Participants             | 13* | (a) Report numbers of individuals at each stage of study—eg numbers potentially eligible, examined for eligibility, confirmed eligible, included in the study, completing follow-up, and analysed            | Page 13                        |
|                          |     | (b) Give reasons for non-participation at each stage                                                                                                                                                         | Page 13                        |
|                          |     | (c) Consider use of a flow diagram                                                                                                                                                                           | Page 13, Figure1               |
| Descriptive data         | 14* | (a) Give characteristics of study participants (eg demographic, clinical, social) and information on exposures and potential confounders                                                                     | Page 13, Table 1               |
|                          |     | (b) Indicate number of participants with missing data for each variable of interest                                                                                                                          | Hard endpoint, no missing data |
| Outcome data             | 15* | Report numbers in each exposure category, or summary measures of exposure                                                                                                                                    | Page 14, 15                    |
| Main results             | 16  | (a) Give unadjusted estimates and, if applicable, confounder-adjusted estimates and their precision (eg, 95% confidence interval). Make clear which confounders were adjusted for and why they were included | Page 14, 15                    |
|                          |     | (b) Report category boundaries when continuous variables were categorized                                                                                                                                    | NA                             |
|                          |     | (c) If relevant, consider translating estimates of relative risk into absolute risk for a meaningful time period                                                                                             | Page 14, Table 2               |
| Other analyses           | 17  | Report other analyses done—eg analyses of subgroups and interactions, and sensitivity analyses                                                                                                               | Page 14, 15                    |
| <b>Discussion</b>        |     |                                                                                                                                                                                                              |                                |
| Key results              | 18  | Summarise key results with reference to study objectives                                                                                                                                                     | Page 15,16                     |
| Limitations              | 19  | Discuss limitations of the study, taking into account sources of potential bias or imprecision.<br>Discuss both direction and magnitude of any potential bias                                                | Page 16,17                     |
| Interpretation           | 20  | Give a cautious overall interpretation of results considering objectives, limitations, multiplicity of analyses, results from similar studies, and other relevant evidence                                   | Page 17,18,19                  |
| Generalisability         | 21  | Discuss the generalisability (external validity) of the study results                                                                                                                                        | Page 16,17 and 20              |
| <b>Other information</b> |     |                                                                                                                                                                                                              | Page 10,21                     |
| Funding                  | 22  | Give the source of funding and the role of the funders for the present study and, if applicable, for the original study on which the present article is based                                                | Page 20                        |

\*Give information separately for cases and controls in case-control studies and, if applicable, for exposed and unexposed groups in cohort and cross-sectional studies.

**Note:** An Explanation and Elaboration article discusses each checklist item and gives methodological background and published examples of transparent reporting. The STROBE checklist is best used in conjunction with this article (freely available on the Web sites of PLoS Medicine at <http://www.plosmedicine.org/>, Annals of Internal Medicine at <http://www.annals.org/>, and Epidemiology at <http://www.epidem.com/>). Information on the STROBE Initiative is available at [www.strobe-statement.org](http://www.strobe-statement.org).

1  
2  
3  
4  
5  
6  
7  
8  
9  
10  
11  
12  
13  
14  
15  
16  
17  
18  
19  
20  
21  
22  
23  
24  
25  
26  
27  
28  
29  
30  
31  
32  
33  
34  
35  
36  
37  
38  
39  
40  
41  
42  
43  
44  
45  
46  
47  
48  
49

For peer review only
