# Supplementary material for: The impact of chronic hepatitis B infection on major adverse cardiovascular events and all-cause mortality in patients with diabetes: a nationwide population-based study from Taiwan
Source: PubMed Central journal article supplement — BMJ Open. 2017 Aug 21;7(8):e016179. doi: 10.1136/bmjopen-2017-016179 (PMC5629723; doi:10.1136/bmjopen-2017-016179), 2017-08-21
Supplement: bmjopen-2017-016179supp001.pdf [file bmjopen-2017-016179supp001.pdf]

**Supplemental Table A1** Propensity score model results for the probability of diagnosis of HBV infection

| Parameter            | Estimate | Odds ratio | 95% CI |       | p value |
|----------------------|----------|------------|--------|-------|---------|
|                      |          |            | Lower  | Upper |         |
| Age, per year        | -0.0411  | 0.96       | 0.959  | 0.961 | <0.0001 |
| Male sex             | 0.4718   | 1.603      | 1.568  | 1.638 | <0.0001 |
| Year of index date   |          |            |        |       |         |
| 2000                 |          | 1          |        |       |         |
| 2001                 | -0.1146  | 0.892      | 0.822  | 0.967 | 0.0055  |
| 2002                 | -0.2589  | 0.772      | 0.714  | 0.835 | <0.0001 |
| 2003                 | -0.4023  | 0.669      | 0.619  | 0.723 | <0.0001 |
| 2004                 | -0.4794  | 0.619      | 0.575  | 0.667 | <0.0001 |
| 2005                 | -0.5758  | 0.562      | 0.523  | 0.605 | <0.0001 |
| 2006                 | -0.6641  | 0.515      | 0.479  | 0.553 | <0.0001 |
| 2007                 | -0.7626  | 0.466      | 0.434  | 0.501 | <0.0001 |
| 2008                 | -0.8804  | 0.415      | 0.386  | 0.446 | <0.0001 |
| 2009                 | -0.9874  | 0.373      | 0.347  | 0.401 | <0.0001 |
| 2010                 | -1.0996  | 0.333      | 0.31   | 0.358 | <0.0001 |
| 2011                 | -1.2988  | 0.273      | 0.254  | 0.293 | <0.0001 |
| 2012                 | -1.3871  | 0.25       | 0.232  | 0.269 | <0.0001 |
| Month of index date  |          |            |        |       |         |
| January              |          | 1          |        |       |         |
| February             | -0.0141  | 0.986      | 0.933  | 1.042 | 0.6135  |
| March                | -0.0354  | 0.965      | 0.916  | 1.016 | 0.18    |
| April                | -0.0224  | 0.978      | 0.929  | 1.03  | 0.3935  |
| May                  | -0.044   | 0.957      | 0.909  | 1.007 | 0.0913  |
| June                 | -0.0566  | 0.945      | 0.897  | 0.995 | 0.0315  |
| July                 | -0.0694  | 0.933      | 0.887  | 0.982 | 0.0074  |
| August               | -0.0812  | 0.922      | 0.876  | 0.97  | 0.0017  |
| September            | -0.1023  | 0.903      | 0.858  | 0.95  | <0.0001 |
| October              | -0.0938  | 0.91       | 0.865  | 0.958 | 0.0003  |
| November             | -0.116   | 0.891      | 0.846  | 0.937 | <0.0001 |
| December             | -0.1214  | 0.886      | 0.842  | 0.932 | <0.0001 |
| Monthly income, NT\$ |          |            |        |       |         |
| Dependent            |          | 1          |        |       |         |
| <19,100              | -0.1658  | 0.847      | 0.819  | 0.876 | <0.0001 |
| 19,100–41,999        | 0.1102   | 1.116      | 1.087  | 1.147 | <0.0001 |
| ≥42,000              | 0.2833   | 1.328      | 1.279  | 1.377 | <0.0001 |

|                                                                                  |         |       |       |       |         |
|----------------------------------------------------------------------------------|---------|-------|-------|-------|---------|
| Urbanisation level                                                               |         |       |       |       |         |
| 1 (urban)                                                                        |         | 1     |       |       |         |
| 2                                                                                | -0.0904 | 0.914 | 0.894 | 0.934 | <0.0001 |
| 3                                                                                | -0.1119 | 0.894 | 0.847 | 0.944 | <0.0001 |
| 4 (rural)                                                                        | -0.0171 | 0.983 | 0.877 | 1.103 | 0.7708  |
| Outpatient visits to metabolism and endocrinology professionals in the past year |         |       |       |       |         |
| 0                                                                                |         |       |       |       |         |
| 1–5                                                                              | 0.158   | 1.171 | 1.13  | 1.214 | <0.0001 |
| 6–10                                                                             | -0.1084 | 0.897 | 0.84  | 0.959 | 0.0014  |
| >10                                                                              | -0.0625 | 0.939 | 0.845 | 1.044 | 0.2474  |
| Charlson Comorbidity Index score <sup>a</sup>                                    | 0.1398  | 1.15  | 1.143 | 1.157 | <0.0001 |
| Adapted Diabetes Complications Severity Index score <sup>b</sup>                 | -0.073  | 0.93  | 0.917 | 0.942 | <0.0001 |
| Duration of diabetes, months                                                     | 0.0028  | 1.003 | 1.003 | 1.003 | <0.0001 |
| Anti-diabetic drugs                                                              |         |       |       |       |         |
| Acarbose                                                                         | 0.0507  | 1.052 | 0.977 | 1.133 | 0.18    |
| Sulfonylurea                                                                     | 0.1154  | 1.122 | 1.084 | 1.162 | <0.0001 |
| Insulin                                                                          | 0.2091  | 1.233 | 1.145 | 1.327 | <0.0001 |
| Metformin                                                                        | 0.151   | 1.163 | 1.122 | 1.206 | <0.0001 |
| Thiazolidinedione                                                                | -0.3096 | 0.734 | 0.677 | 0.795 | <0.0001 |
| Dipeptidyl peptidase-4 inhibitor                                                 | 0.0812  | 1.085 | 0.976 | 1.205 | 0.1308  |
| Anti-hypertensive drugs                                                          |         |       |       |       |         |
| Alpha blocker                                                                    | -0.081  | 0.922 | 0.833 | 1.02  | 0.1164  |
| Beta blocker                                                                     | 0.032   | 1.032 | 0.991 | 1.076 | 0.1247  |
| Calcium channel blocker                                                          | -0.0569 | 0.945 | 0.908 | 0.982 | 0.0044  |
| Diuretic                                                                         | 0.3296  | 1.39  | 1.33  | 1.454 | <0.0001 |
| ACE inhibitor/ARB                                                                | -0.0856 | 0.918 | 0.882 | 0.955 | <0.0001 |
| Other concomitant medications                                                    |         |       |       |       |         |
| Antiplatelet                                                                     | -0.185  | 0.831 | 0.791 | 0.873 | <0.0001 |
| Steroid                                                                          | -0.1578 | 0.854 | 0.814 | 0.896 | <0.0001 |
| Antidepressant                                                                   | 0.0542  | 1.056 | 0.991 | 1.125 | 0.0936  |
| Statin                                                                           | -0.4718 | 0.624 | 0.592 | 0.658 | <0.0001 |
| PPI                                                                              | 1.1059  | 3.022 | 2.864 | 3.189 | <0.0001 |
| NSAID                                                                            | 0.0767  | 1.08  | 1.053 | 1.108 | <0.0001 |
| Comorbidities                                                                    |         |       |       |       |         |
| Hypertension                                                                     | -0.1764 | 0.838 | 0.818 | 0.859 | <0.0001 |
| Coronary artery disease                                                          | 0.0571  | 1.059 | 1.028 | 1.09  | 0.0002  |
| Heart failure                                                                    | -0.3525 | 0.703 | 0.666 | 0.741 | <0.0001 |

|                        |         |       |       |       |         |
|------------------------|---------|-------|-------|-------|---------|
| Peptic ulcer disease   | 0.1731  | 1.189 | 1.162 | 1.217 | <0.0001 |
| Chronic kidney disease | 0.0234  | 1.024 | 0.993 | 1.055 | 0.1335  |
| Atrial fibrillation    | -0.1366 | 0.872 | 0.792 | 0.961 | 0.0057  |
| Dyslipidaemia          | 0.103   | 1.108 | 1.084 | 1.133 | <0.0001 |
| Valvular heart disease | 0.0353  | 1.036 | 0.992 | 1.082 | 0.1102  |
| Cancer                 | 0.1052  | 1.111 | 1.07  | 1.153 | <0.0001 |
| Autoimmune disease     | 0.0809  | 1.084 | 1.028 | 1.144 | 0.0031  |
| Physical limitation    | 0.0747  | 1.078 | 1.021 | 1.137 | 0.0063  |

<sup>a</sup> Used to determine overall systemic health; each increase reflects a stepwise increase in cumulative mortality.

<sup>b</sup> A 13-point scale with 7 complication categories: retinopathy, nephropathy, neuropathy, cerebrovascular, cardiovascular, peripheral vascular disease, and metabolic. Each complication is given a numeric score ranging from 0 to 2 (0 = no abnormality, 1 = some abnormality, 2 = severe abnormality).

*Abbreviations:* CI, confidence interval; ACE, angiotensin-converting enzyme; ARB, angiotensin II receptor blocker; PPI, proton pump inhibitor; NSAID, non-steroidal anti-inflammatory drug.

**Supplemental Table A2** Results of subgroup analyses of mortality risk among diabetic patients with HBV infection and matched control subjects

| Characteristic                                         | Adjusted <sup>a</sup>    |                | Interaction<br><i>p</i> value |
|--------------------------------------------------------|--------------------------|----------------|-------------------------------|
|                                                        | Hazard ratio<br>(95% CI) | <i>p</i> value |                               |
| Sex                                                    |                          |                |                               |
| Male                                                   | 0.785 (0.754–0.817)      | <0.001         | 0.030                         |
| Female                                                 | 0.714 (0.667–0.765)      | <0.001         |                               |
| Age                                                    |                          |                |                               |
| 20–65 years                                            | 0.749 (0.719–0.781)      | <0.001         | 0.165                         |
| >65 years                                              | 0.770 (0.724–0.819)      | <0.001         |                               |
| Hypertension                                           |                          |                |                               |
| Yes                                                    | 0.870 (0.831–0.912)      | <0.001         | <0.001                        |
| No                                                     | 0.668 (0.635–0.703)      | <0.001         |                               |
| Coronary artery disease                                |                          |                |                               |
| Yes                                                    | 0.786 (0.735–0.840)      | <0.001         | 0.345                         |
| No                                                     | 0.759 (0.729–0.790)      | <0.001         |                               |
| Chronic kidney disease                                 |                          |                |                               |
| Yes                                                    | 0.818 (0.757–0.886)      | <0.001         | 0.114                         |
| No                                                     | 0.754 (0.726–0.784)      | <0.001         |                               |
| Dyslipidaemia                                          |                          |                |                               |
| Yes                                                    | 0.936 (0.887–0.986)      | 0.014          | <0.001                        |
| No                                                     | 0.630 (0.602–0.659)      | <0.001         |                               |
| Use of insulin                                         |                          |                |                               |
| Yes                                                    | 0.932 (0.792–1.096)      | 0.395          | 0.020                         |
| No                                                     | 0.759 (0.733–0.786)      | <0.001         |                               |
| Adapted Diabetes Complications<br>Severity Index score |                          |                |                               |
| 0–1                                                    | 0.749 (0.719–0.780)      | <0.001         | 0.010                         |
| ≥2                                                     | 0.826 (0.774–0.881)      | <0.001         |                               |

<sup>a</sup>Adjusted for monthly income, urbanisation level, Charlson Comorbidity Index score, dipeptidyl peptidase-4 inhibitor use, metformin use, sulfonylurea use, alpha blocker use, dyslipidaemia, atrial fibrillation, peripheral vascular disease, and heart failure.

**Supplemental Table A3** Results of subgroup analysis of risk of MACE among diabetic patients with HBV infection and matched control subjects

| Characteristic                                         | Adjusted <sup>a</sup>    |         | Interaction<br>p value |
|--------------------------------------------------------|--------------------------|---------|------------------------|
|                                                        | Hazard ratio<br>(95% CI) | p value |                        |
| Sex                                                    |                          |         |                        |
| Male                                                   | 0.526 (0.480–0.576)      | <0.001  | 0.002                  |
| Female                                                 | 0.686 (0.596–0.789)      | <0.001  |                        |
| Age                                                    |                          |         |                        |
| 20–65 years                                            | 0.579 (0.528–0.636)      | <0.001  | 0.799                  |
| >65 years                                              | 0.575 (0.502–0.659)      | <0.001  |                        |
| Hypertension                                           |                          |         |                        |
| Yes                                                    | 0.619 (0.563–0.680)      | <0.001  | 0.005                  |
| No                                                     | 0.493 (0.431–0.564)      | <0.001  |                        |
| Coronary artery disease                                |                          |         |                        |
| Yes                                                    | 0.670 (0.585–0.766)      | <0.001  | 0.005                  |
| No                                                     | 0.533 (0.486–0.585)      | <0.001  |                        |
| Chronic kidney disease                                 |                          |         |                        |
| Yes                                                    | 0.638 (0.536–0.760)      | <0.001  | 0.158                  |
| No                                                     | 0.558 (0.512–0.607)      | <0.001  |                        |
| Dyslipidaemia                                          |                          |         |                        |
| Yes                                                    | 0.638 (0.576–0.707)      | <0.001  | 0.003                  |
| No                                                     | 0.501 (0.447–0.562)      | <0.001  |                        |
| Use of insulin                                         |                          |         |                        |
| Yes                                                    | 1.143 (0.734–1.781)      | 0.555   | 0.005                  |
| No                                                     | 0.560 (0.518–0.605)      | <0.001  |                        |
| Adapted Diabetes Complications<br>Severity Index score |                          |         |                        |
| 0–1                                                    | 0.545 (0.497–0.598)      | <0.001  | 0.044                  |
| ≥2                                                     | 0.640 (0.557–0.735)      | <0.001  |                        |

<sup>a</sup>Adjusted for monthly income, urbanisation level, Charlson Comorbidity Index score, dipeptidyl peptidase-4 inhibitor use, metformin use, sulfonylurea use, alpha blocker use, dyslipidaemia, atrial fibrillation, peripheral vascular disease, and heart failure.
